# Supplementary material for: Novel a new prognostic model of Thyroid Carcinoma based on Macrophage and Cuproptosis-Related lncRNA
Source: Research Square preprint supplement (doi:10.21203/rs.3.rs-6528117/v1), 2025-05-19
Supplement: Supplementary file 1 [file b7bb10d2a1c76d8e7c9a15d9.docx]

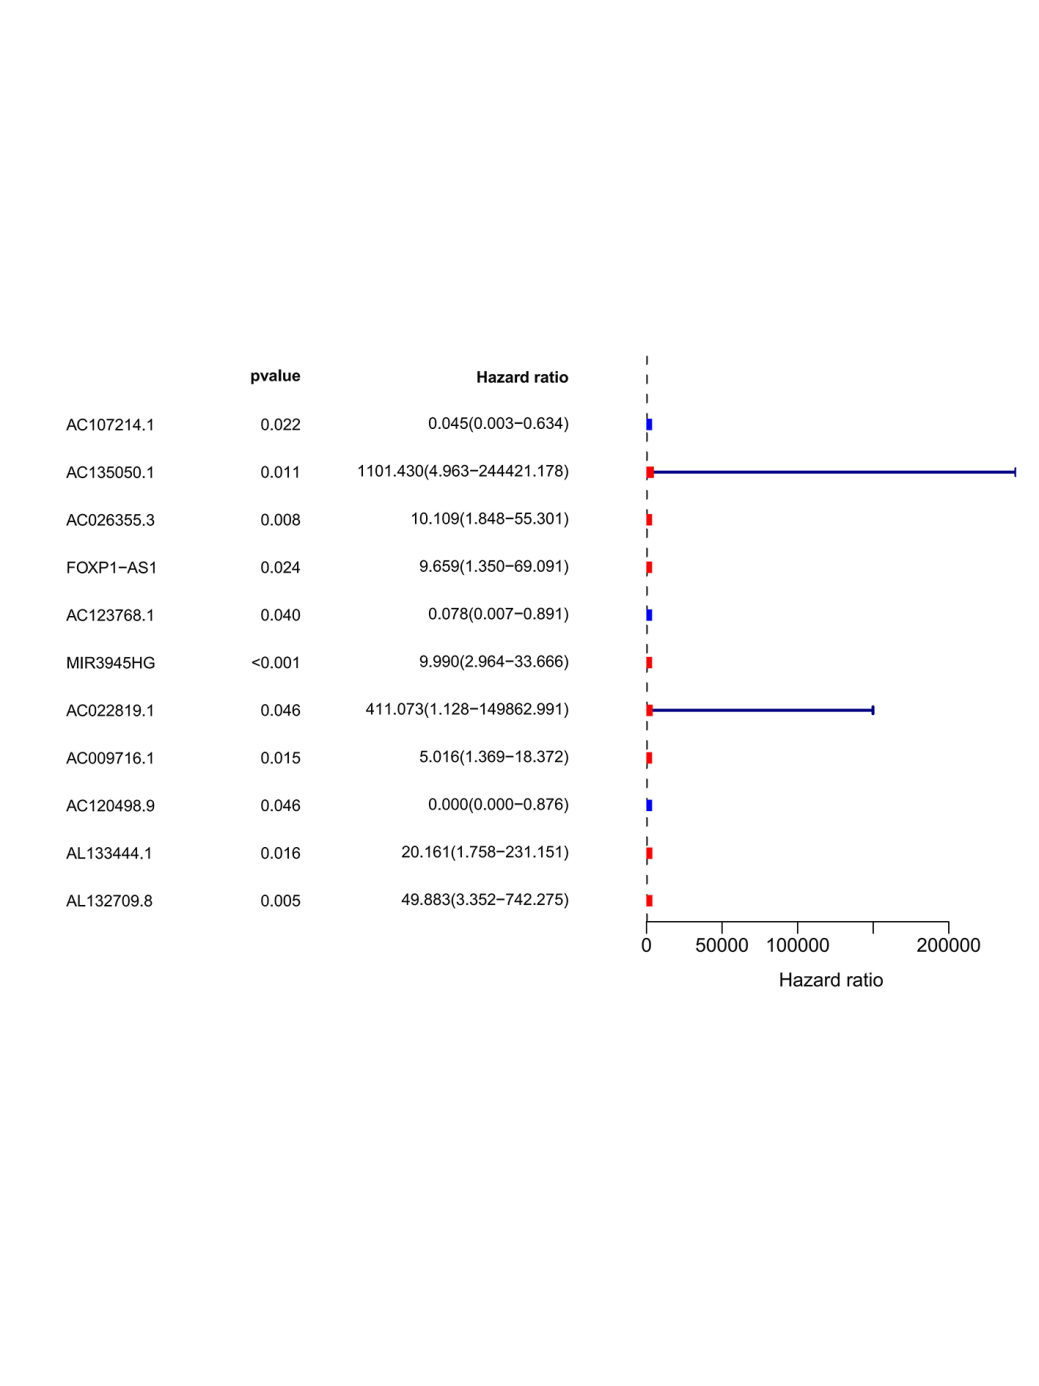


**Figure S1 The result of Unicox regression analysis**

**
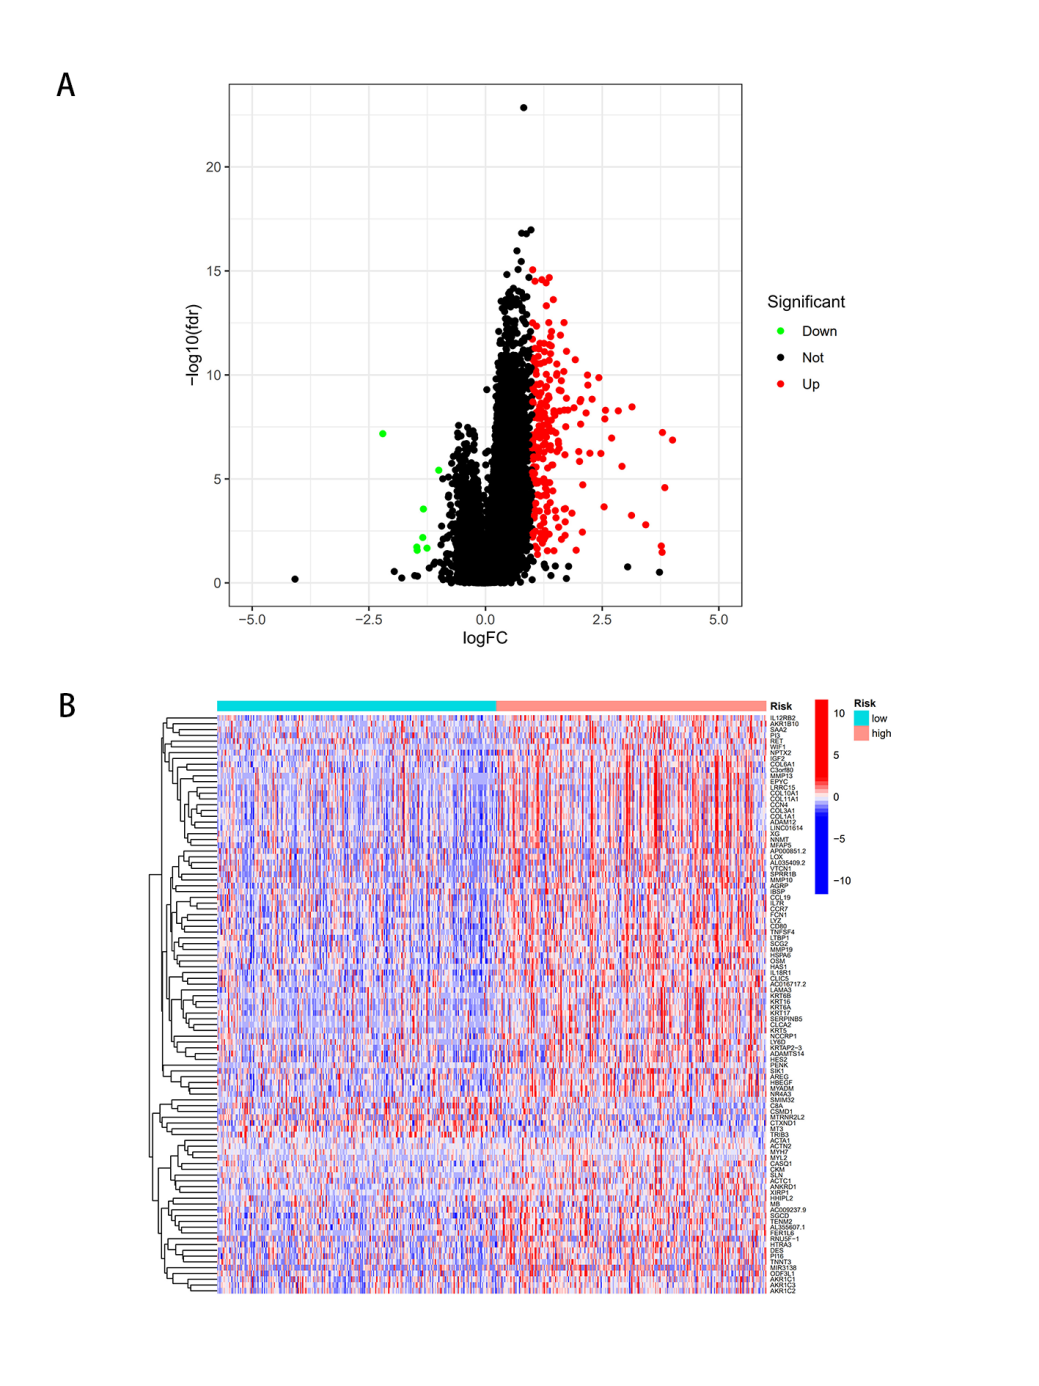
**

**Figure S2 The result of Diferential Analysis.** (A)Volcano plot of differential genes**.** (B) The top 50 DEGs.


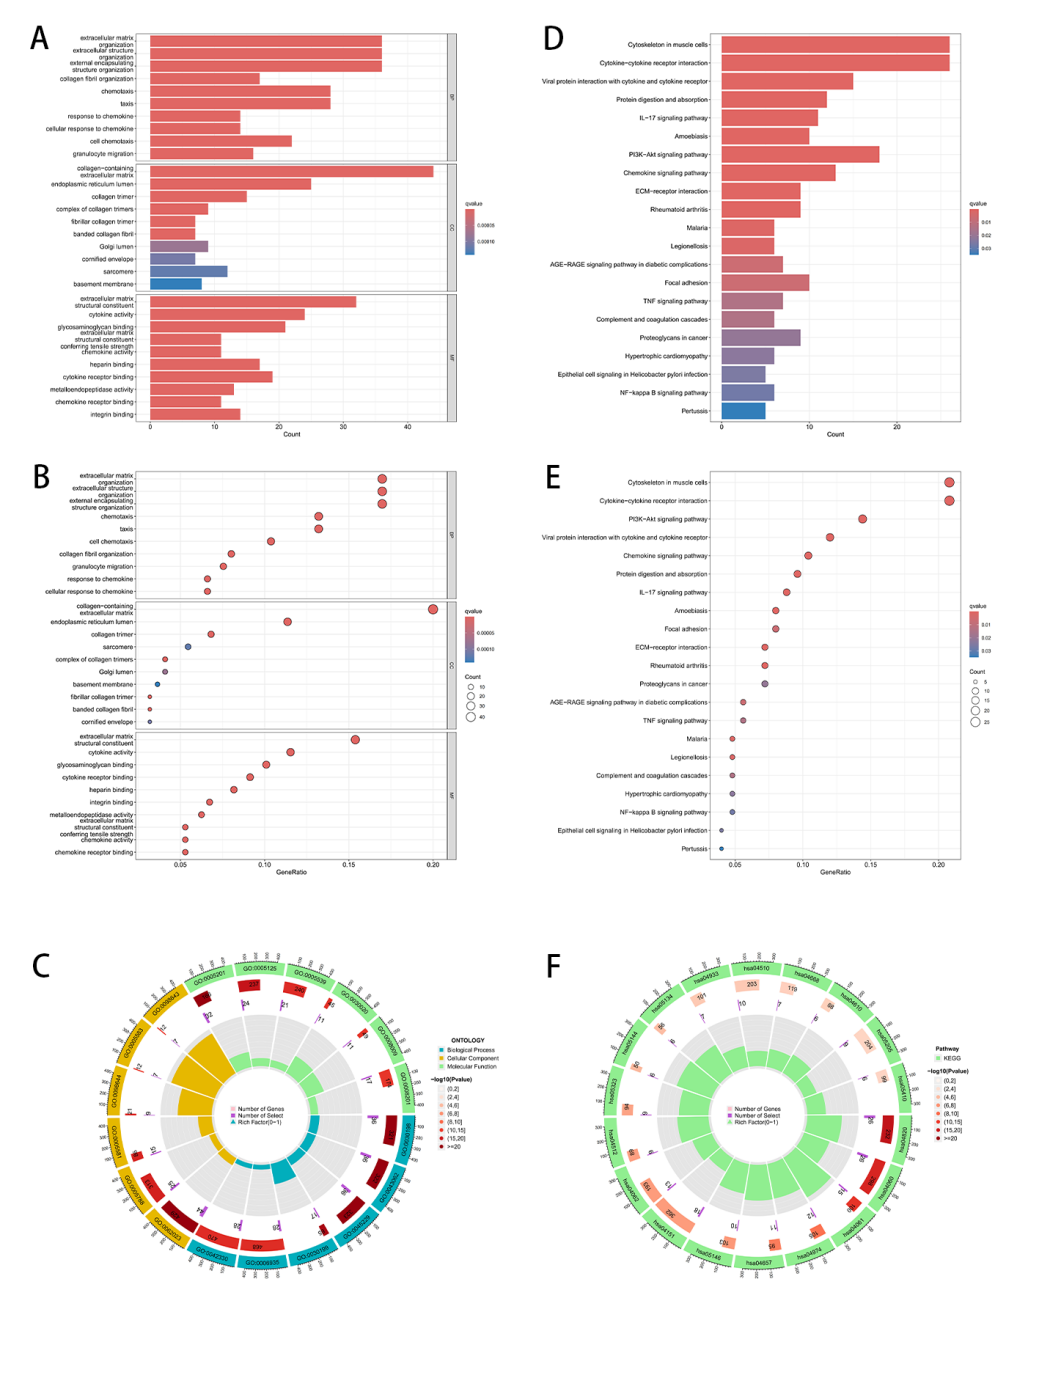


**Figure S3 GO and KEGG enrichment analysis.** (A-C) The result of GO analysis. (D-F) The result of KEGG analysis.
