# Supplementary material for: Novel a new prognostic model of Thyroid Carcinoma based on Macrophage and Cuproptosis-Related lncRNA
Source: Research Square preprint supplement (doi:10.21203/rs.3.rs-6528117/v1), 2025-05-19
Supplement: Supplementary file 2 [file f54a95927249cbca6c96708b.xlsx]

## Sheet: Table S1
T cell	CD3D,"CD3E","TRAC","CD8A"
B cell	MS4A1,"CD79A", "CD19"
Plasma cell	CD79A,"IGKC","JCHAIN","MZB1"
Mast cell	TPSAB1,"TPSB2"
Neutrophil	FCGR3A,"ITGAM"
NK cell	FGFBP2,"FCG3RA","CX3CR1","GNLY","NKG7","KLRD1"
Epithelial	EPCAM,"KRT18","KRT19","PROM1","ALDH1A1","CD24"
Macrophages	CD68,"CD163","CD14","LYZ"
Fibroblast	COL1A1,"COL3A1","FGF7","MME"
Endothelial	VWF , "PECAM1", "PLPP1"
Thyroid follicular cells	IYD,"TG","TPO"

## Sheet: Table S2
Cuproptosis
NFE2L2
NLRP3
ATP7B
ATP7A
SLC31A1
FDX1
LIAS
LIPT1
LIPT2
DLD
DLAT
PDHA1
PDHB
MTF1
GLS
CDKN2A
DBT
GCSH
DLST

## Sheet: Table S3
High_Cuproptosis_Score
GCSH
FDX1
PDHA1
DLST
ATP1B1
CLDN7
SPINT2
MGST1
TSTD1
PCBD1
NKX2-1
DLD
S100A14
CLDN4
KRT7
KRT8
EPCAM
SFTA3
CLDN3
CAPG
PAX8
CPVL
RBM47
PERP
KRT18
PDHB
DMKN
S100A1
SORD
CDH1
BHLHE41
TMEM141
PRDX3
RAB25
BEX2
MUC15
GPRC5A
MBIP
CKB
FUCA1
TPMT
MGAT4C
ECI1
TBX3
BEX4
ECHDC2
NTRK2
PDE8B
MRPS6
TMED3
SDC2
ECHS1
TKT
CD24
SNX5
TMED4
SLC25A29
DAPK2
AP1M2
RAB34
DSP
TSHR
LMO3
HOPX
LCN12
SDC4
HEBP1
DDIT3
SNRPN
SPINT1
CHPT1
KLF5
MRPL40
SPINT1-AS1
SH3YL1
ISCA2
COPRS
TXNL1
MAOA
VAMP8
MAFB
MAL2
ALDH3A2
PPP1R14C
AK1
HHEX
CXADR
ASAH1
TNFRSF12A
ECRG4
NDUFB9
PHPT1
KIF22
S100A13
GPX3
CST6
AP003498.2
CLIC3
ARMCX2
ELF3
DDR1
KRT19
WFDC2
CUTA
C16orf89
MTCH1
TACSTD2
RASEF
PRDX6
TM7SF2
OCLN
REEP5
KCNJ16
FOXE1
TCEA3
DUOXA1
SNHG8
DAPL1
KCNJ15
BSPRY
PRDX5
PFN2
NPC2
DSG2
SMIM1
HMGN2
NDUFC2
IYD
CLU
NDUFB2
CLTA
BMP7
SOX9
CTSB
AC127526.5
GPX4
TSPAN1
LINC01315
NDUFA4
APLP2
PEBP1
INPP5J
GSTP1
PRDX1
S100A6
RPL12
RPS4X
FTH1
EEF1A1
WDR34
TPD52L1
ABHD11
NMB
PLOD2
PDLIM4
MORN2
PGRMC1
BEX3
NDUFB11
ANXA3
ATP6V1D
SERINC2
NPNT
VEGFA
GGCT
PPDPF
TG
SERPINA1
PRDX2
IFT22
AGPAT2
STXBP6
SMIM5
HSD17B8
COX7C
SMIM4
SCPEP1
RPL24
DPY30
ILVBL
ANXA1
F11R
DUOX2
NPM1
TMEM30B
LMO7
HMGN1
KIF9
CETN2
TALDO1
CCN1
TMEM205
MT1X
TMEM14B
CAPS
NINJ1
PNKD
HACD3
COPZ1
SGMS2
GABARAP
TMC4
SLC12A8
ACAA2
ATP5IF1
CDS1
CITED1
METTL7A
MRPS26
HSBP1L1
MRPS23
DIO2
KDELR1
CSTB
NDUFC1
CERS4
BLVRB
CAT
LMAN2
COX14
SLC5A3
SELENBP1
TMEM9
VSIG2
SLC25A4
POLR2I
SDSL
COX8A
ZC2HC1A
MSRB2
HMGCL
APMAP
TMEM98
ABHD14A
PHLDA2
MRPL43
RHOD
CCNI
C12orf49
CD9
SPAG7
NDUFA7
ID4
IQCA1
RPN2
ADI1
FMC1
NDUFS5
SUCLG1
CRYGN
NDUFA5
MACROD1
IFT57
LGALS3
ATP5MF
LSR
SH2D4A
CD63
HINT1
TMEM54
MZT2A
CREG1
TMED1
ERRFI1
ERG28
MYL6B
MESD
ACAA1
TMBIM6
BASP1
HYI
HDDC2
ARG2
SCX
ATP6V0B
SLC25A23
TRIP6
MZT2B
STUB1
PLEK2
NFE2L2
DBI
POLR2L
SNHG29
ETFB
TIMM13
ISCU
TMEM125
GRAMD2B
ATP13A4
SAT1
NDUFAB1
FIS1
STARD10
NDUFA13
PPA1
MARVELD2
ERGIC3
MRPL57
P4HTM
LPCAT2
LAMTOR1
ST3GAL5
CADM1
ARC
OCIAD2
TOMM20
WBP1
PEMT
TMEM14C
CHCHD5
MAGEF1
ATRAID
DUOX1
C7orf50
DMAC1
ALDH9A1
FAM162A
CXXC5
CIRBP
RHOBTB3
NUDT14
ABHD12
COA3
PRSS8
NDUFAF3
PARD6B
LRPAP1
TMEM147
FCGBP
DCXR
ATP6AP2
PDIA6
AHCY
IVD
DRAP1
SMIM19
TMEM37
CHMP2B
PDIA4
PCP4
TMEM134
CPQ
GNG5
AKR1A1
SLC17A5
RMST
SLC7A8
TRAPPC3
PMVK
CDK4
WDR86
LDHB
WWC1
ACADVL
ATP5MC1
RPL15
LGALS3BP
CHID1
ZNF486
SLC26A7
ARF4
DCDC2
SELENOH
YIF1A
SEC11A
MIF
NDUFS8
ATP6V1G1
NAA20
CRB3
ZFAS1
SMS
ATP5MC3
PHB
PDGFRL
SLC25A39
ARMCX3
MPV17
RASSF4
PPIB
EDF1
RPL5
PPP1R9A
TESC
PRR15
MARCKSL1
COA4
YIPF2
TPD52
ALCAM
SNHG32
DBP
SMIM14
LIPG
ERBB2
MRPL51
MMAB
EGR2
HEBP2
COQ4
DNASE2
HOOK1
MYH14
ZDHHC4
LARP6
LSM4
MDH1
RPL7A
ENPP5
SPCS1
HBEGF
COX5A
SMIM30
MRPL23
MLF2
RCN2
COL8A1
DUSP14
MPZL2
ALKBH7
CHMP2A
SCCPDH
CNPY2
ARMCX6
HSD17B6
MET
MRPL14
PTPRF
GPRC5C
ZNF593
BDH2
BOD1
FDX2
CD164
IGBP1
MAPK13
TMED10
THNSL2
ATP5PD
PPCS
SRSF9
DDRGK1
ST14
CHCHD2
MRPL17
UPK3BL1
ALG5
TXNDC17
PTTG1
UROD
EPS8L2
ZBED2
TSEN34
THYN1
COPE
ARL1
MTHFS
C5orf38
ODC1
PLPP2
PHYHD1
APEX1
ATP5F1D
HSPA5
BORCS7
AHCYL1
ITPA
STOML2
LONRF2
CYSTM1
KLF4
SSPN
PTGR1
ATP6V0E1
AP1S1
SHTN1
GPAA1
MT1E
CTNNAL1
VDAC2
PRXL2A
NEDD4L
MEAF6
COX5B
GTF2H5
UQCR10
MANF
GXYLT2
FAM3C
MRPS33
C4orf48
IGF2BP2
CBR1
PPIC
HIGD1A
DCTD
MRPS25
TMEM59
CNDP2
TSPAN6
TAF10
ACTG1
RTN3
SWI5
MOCS2
CMTM4
EMC10
MPC2
C11orf1
AKR7A2
ATP5MPL
AIG1
PEBP4
ARL3
OGFOD3
SLC26A4
MANBAL
CHPF
MRPL20
ITGA3
NDUFB7
ESRP1
HMGA1
ENPP1
VTI1B
MRPS36
PPIA
PDLIM1
CYBRD1
PLAAT3
ARL6IP1
TSPAN3
NIPSNAP2
SF3B6
MALSU1
HINT2
DDOST
C19orf53
SEMA4A
NME1
C1orf122
HSP90B1
VPS28
TCEAL4
NEBL
NR2F6
AURKAIP1
CLN5
DPM2
KLHDC2
SNHG19
RHBDD2
MEA1
TOM1L1
HPN
TPT1
BSCL2
PSMB6
MAP3K13
HMGN3
TATDN1
AFAP1L2
SCD5
FBP1
SHMT1
RAB11B
DHRS3
TXN
ARHGEF35
PSMG1
RDH11
C19orf33
RND3
JADE1
CHMP4C
PIN4
DDT
USP54
HSD17B4
UQCRQ
GINM1
PLD3
CDK2AP2
SURF1
PTRHD1
LRIG3
ASS1
MAPKAPK3
MCUR1
ERP29
MRPL54
ZSCAN18
PSENEN
GMPR2
TCERG1L
CKS1B
RPARP-AS1
TRIB1
MRPL3
SLC39A4
PIGP
SAT2
C6orf132
ATF3
ATOX1
CRABP2
CFAP36
ARL4D
GIPC1
SH3BGRL2
EFEMP2
UCP2
BANF1
PPL
CTSH
PLGRKT
SPAG16
HSPB11
DCSTAMP
PARK7
GDF15
DALRD3
CLDN1
TMEM179B
MLF1
PEF1
PDIA3
EBNA1BP2
EIF3I
NHP2
HOMER3
IGSF8
MYL12B
C12orf10
SNTA1
TCEAL3
CMYA5
DNAJB2
CHCHD1
ZCRB1
CIB1
CAMK2B
DTX4
BUD23
ROMO1
PRKCD
TMED2
COA5
OBSL1
TMEM9B
PHGDH
DERA
CCNB1IP1
GRINA
MRPS24
PDZD11
SPATA20
GSTZ1
RPL10A
CRYL1
ZFYVE21
LSM5
GALE
WDR83OS
UBXN6
MRPL27
RILP
C18orf32
FBXO7
ACP1
ST6GAL2
PSMB1
MCRIP2
SNHG7
RNF181
NDUFS3
TMEM265
DPCD
SEC11C
MMP24OS
DPM3
LMAN1
MGAT4B
NT5C
EBAG9
DGCR6L
SLC22A18
TMEM106C
LTBP2
EIF4EBP3
TMEM243
BAD
KRTCAP3
PPP1R7
CFAP298
MIR100HG
MTX1
SNHG5
SSR3
GLOD4
LAMTOR5
GLUL
CCN2
NUDT16L1
CCDC28A
COX6A1
MRPL21
QPCT
RPL7
TRAPPC6A
UCHL3
MAL
EMC6
PGLS
RETREG2
CFAP410
TEX264
EXOSC7
GNPDA1
ATP6V1F
ANAPC11
GSTO1
MYDGF
BSG
TM2D2
TXN2
SLC25A38
MRPS21
TSTA3
HOMER2
APH1A
SMCO4
COA8
PLEKHH1
GSTO2
SIVA1
CITED2
MYOF
PRRG4
MPG
ZNF714
PLXNB2
CREB3
GADD45G
TRAPPC2L
DNAJC30
DYNLRB1
SNRPE
MRPS34
IMPDH2
ACY1
TSR2
MAGED2
AK6
PLIN3
CCDC25
FAAP20
FAM200B
ANKRD42
PXK
PKM
ZNF667-AS1
MDK
MRPL52
PSD3
DNAJC4
BAG1
BCAP31
ERH
SNX2
BCL7A
TBCA
FGFRL1
UPF3A
TSPYL1
TOMM6
UBL5
CD47
IGFBP5
CALR
SULT1A1
EIF6
LDOC1
ATP5F1C
AK2
LSM3
RHPN1
SMIM20
LHPP
RHEB
H2AFJ
SNRNP25
SFT2D1
NDUFS4
PCYOX1
MXRA7
BUD31
MRPL55
CTSD
NAXE
TMBIM4
UQCC2
DNPH1
FIBP
HSBP1
TADA3
PSMB5
TCTN1
PLEKHA5
METTL5
NIT2
MT1F
SLC34A2
LAMP2
RAB4A
PACSIN3
AGTRAP
PCMT1
RIC3
TRAF4
SUMO1
SLIRP
NAB2
APIP
ATG101
GAS5
PRKCI
NUDT22
DCTN3
NUDT8
NFIC
EIF1B
YIPF3
TLE2
NT5C3B
NDUFB5
RPA3
EPB41L4A-AS1
PBX1
DTNA
MRPS16
PLRG1
SCAND1
RFXANK
SDF2L1
TPI1
EEF1G
MIEN1
NAE1
ZSWIM7
TUBA1C
SELENOW
SPG21
BRK1
NDUFA8
TIMM50
ATP5F1A
DNAJC19
RIOX2
CIAO2B
CERS2
CLNS1A
RNF170
UNC50
PMF1
FARP1
SHROOM3
WEE1
VEGFC
PFKP
ANAPC15
POLR2H
TCTEX1D2
SVIP
TSPAN31
SCOC
SMARCA1
TMEM42
TMEM159
MYH10
ZDHHC2
SAMD12
DUSP23
PLA2G12A
CRYAB
SDHC
TM7SF3
PSMD8
CROT
ANXA4
TSPAN4
IAH1
SMDT1
EPB41L5
CAPN1
PRNP
TP53I3
APEH
PPIE
NTPCR
PATJ
TCEA2
MRPL2
DUSP6
CCND1
STXBP2
ATP5MD
SLC25A3
GLT8D1
TGIF1
MRPL4
ZNF580
POLR2J
ARL6IP4
FAM189A2
FAM136A
TMEM208
STK33
MXRA8
S100A16
ZNF770
FUCA2
RAD23B
C1D
COX16
MAP9
VPS25
ACOT13
EGFR
TMEM18
TIMM8B
DPP7
CCND2
MCFD2
STMP1
NDUFAF8
AC100810.1
PPP4C
TSR3
KIAA1522
JTB
PGRMC2
CAV2
PKIA
NDUFA11
PHB2
TMEM50B
RPL17
MIR4458HG
LAMTOR2
CALM2
ANAPC13
SPCS2
FZD1
SMIM15
ASL
NEDD8
GALNT7
YWHAE
TRMT112
NENF
ARSD
NECTIN3
SLC35B1
GDE1
HOMER1
GABARAPL2
TRAPPC5
UROS
ELOB
IFNGR2
EMC3
DAD1
PFDN2
HTATIP2
MOK
NAV2
NACA
GPN3
MRPL38
FKBP3
CD151
MSMO1
ZCCHC12
POR
LGMN
C19orf48
SEC63
PEX19
BLOC1S1
FHIT
FRMD3
ACADS
ATP6AP1
TGFA
SLC20A2
SIL1
FAIM
ILF2
CARS
METTL26
CISD2
HCFC1R1
ADPRHL2
ZFAND2B
DCBLD2
ECH1
UQCRC1
YIPF6
COX4I1
ARFIP2
ARMT1
RGL3
CD2BP2
KCNQ1
HIST1H1C
SNRPA
RPL31
NDUFA12
SMIM26
BTF3L4
LETMD1
RPS19BP1
CISD3
LRRC23
MAP7
UFC1
PITHD1
RNF146
NDUFA2
SNRPG
H2AFY
PAFAH1B3
CST3
RPA2
EMC4
NDUFB8
TMEM251
FAM229B
PGD
THSD4
NUDC
MRPS18B
RAB18
STK16
TMEM219
LAMB3
NDUFA3
DNAJB4
ETFRF1
APRT
SUMO2
SURF2
MLEC
GNG12
KIAA1217
C4orf3
COX6B1
LTBP4
NDUFB10
SNRPC
LYRM1
MVB12A
PSMC5
PTRH1
ARL16
SMIM29
TMEM87A
METTL9
RPS6
RING1
PEX13
CRELD1
MTHFD2L
LCA5
COASY
SRGAP1
PUF60
C14orf119
FBXL15
BZW2
TRPT1
COPS4
PAK1
LAMTOR3
TP53I13
SSBP1
GTF3C6
COX7A2
RPS17
CBX5
TTC3
ERBB3
WDR41
CCDC115
PON2
LAGE3
OARD1
NME4
GADD45A
RPL23
RASD1
FAM49A
ABHD14B
WDR13
VBP1
RRM2B
WBP2
IQCK
SAP18
SIAE
LYRM9
CEP70
MTCH2
CWC15
THUMPD3
ISOC1
MRPL58
WDR6
LTBP3
SELENOF
CCNG1
PDXK
CYP51A1
ABAT
GCHFR
ANTKMT
ZNF428
SLC19A2
ATP5PB
ORMDL3
PDCD6
VDAC1
LAPTM4A
GOLGA8B
CLUAP1
ZNF622
MDH2
SYK
ALDH7A1
PDE4C
SNHG16
HOOK2
EPS8L1
IMP3
TMEM115
JUP
CHCHD10
IER3IP1
CDK10
BNIP3
SBDS
TRAPPC4
UTP18
CCNDBP1
MRPL13
ERLIN2
PALLD
CIAO2A
ENO1
TFG
BRI3
TMEM230
MRPS35
SOD1
HADHB
RTL8A
COPS7A
ADGRG1
NGRN
ADH5
TP53TG1
PLPP5
MORF4L2
WDR45
PSMB3
NAA38
HDHD3
BCKDHA
FAM3A
CD27-AS1
TMEM38B
COX7A2L
ATP6V1A
CBR3-AS1
HIST1H2AC
RPS3A
TUSC2
KDM1B
TUBB4B
TUFM
LCMT1
EIF2B2
MTLN
CCNC
IFRD2
UGDH
C12orf45
TMUB1
CTBP2
FAM184A
GALNT3
RPL26L1
C1orf35
SKP1
PLEKHJ1
LYRM2
CYC1
SDF2
GPR108
SLC11A2
AAMP
CCS
RFK
GNPTG
CPE
DOCK3
ZBTB7C
CLTB
ZNF511
CLIP4
ELOC
CCT8
MRFAP1
PPP1CA
RNPEP
COMMD4
NME2
PFDN6
MED8
SNAPIN
TMEM160
SLC44A1
OST4
XBP1
ARF5
SEC61B
IGSF1
ARF3
P4HA2
SRP68
GET3
VPS29
BCL7C
SLC3A2
PFDN5
PIGH
RNF144B
SRI
RPL3
SUDS3
EMD
ATP5MC2
ISOC2
CBY1
CNOT7
RNF187
HDDC3
PBDC1
PLPP3
FAM160A1
SRP9
ARPC1A
PPP1R16A
C2orf74
JOSD2
PSMD9
AKAP1
VKORC1
KCNQ1OT1
NDUFV3
ATP5PO
FAM13A
TRIM2
DTD1
TMEM106B
POLR3K
RBIS
NR6A1
RUVBL2
NEU1
CBWD1
ZNF226
ZNF706
PDCD5
SERTAD3
TOMM5
PTCSC2
SGK3
EXOC7
ENOSF1
RER1
EMG1
ANXA2
DYRK4
CDK5RAP3
TCEAL8
MAGED1
FTL
SLC39A7
TMEM192
BTF3
ALAS1
DDAH2
GAMT
HEXA
PTPMT1
CKS2
COBL
NARS
GOLGA2
CES2
SMIM7
CMTM8
FAM174A
C1orf43
TOMM40
DEGS1
BLVRA
FAM174C
MRPL41
NDUFB4
TMED9
EMC7
PDGFC
MICOS13
RNF5
GUSB
SDHB
ANXA7
ETHE1
MRPL11
LTA4H
KIAA1191
SLC40A1
GRHL2
HMGA2
HDAC1
CORO1B
RCC1L
TWF1
TMEM203
SNF8
PLPBP
SATB1
SERGEF
UQCR11
TMEM35B
NOL7
UBA1
DDAH1
TECR
QDPR
ARRDC3
CYTH2
PRR13
GKAP1
HDGF
SLC25A11
COX6C
MRPL36
CSRP1
G6PC3
CREB5
COMMD7
PPFIBP2
RRAGA
FOXP4
DERL2
PTTG1IP
KRTCAP2
ACAD8
DKC1
ETV5
UQCC3
ANK3
BCKDK
ZMAT1
APTR
ZNF626
PRICKLE1
CZIB
CD55
SSB
GRHPR
MYO5B
ECI2
POLR2C
IFT74
PSMC2
BCAP29
NDUFB3
CMAS
ATP6V0A1
CMTM6
ATP6V0C
C1QBP
GLTP
H3F3A
CTDNEP1
PIH1D1
DNAJC15
FUNDC2
KDSR
MRPL24
RPS9
RAB11FIP1
MRPL46
ATPAF1
RPL14
ATIC
SLC50A1
SNX1
SRP14
IFT20
SARS
SS18L2
COL4A3
NSMCE1
MRPS18A
DANT2
NUTF2
SNHG14
CENPX
DAP
TYW3
PSMA2
BLOC1S2
MCRIP1
NDUFV1
PPP2CB
LYPLA2
SLC39A1
AGA
SHARPIN
COL4A4
LINC02471
SQSTM1
POLD2
S100A11
CSNK2B
PRPSAP1
PNRC2
ELP5
STX12
ATP6V0D1
HIRA
COA6
CCT7
ATP5F1B
PDAP1
CPNE3
ATP9A
ZNRD2
GHITM
CDK7
RMND1
IP6K2
POP7
PRELID1
JAGN1
SELENOT
NUDCD2
PSMB2
NFIX
TRAPPC1
RPS24
MKRN1
ORAI3
NDUFB6
CHMP5
TM9SF1
CLPP
SUPT4H1
ING2
PIP4P1
TMEM41B
ESD
SARNP
MRNIP
MPLKIP
ZFAND1
MCTS1
EBPL
HDHD2
ZNF431
FAM20A
SSU72
PPP1R14B
HSD17B10
BORCS8
GLIS3
COPS9
ATP5PF
DEK
LRP4
BCAS4
PDE5A
GABRB2
RAN
SPART
THUMPD3-AS1
SNHG6
PDK2
MED11
RNH1
MBOAT7
FAM120AOS
SEC61G
C15orf61
CCNG2
TXNDC15
GGPS1
NDUFV2
FMNL2
PPP2R1A
NDUFS6
LYPLAL1
CCDC90B
PSMC3
SAE1
EIF3J-DT
PRPF31
SF3B5
UQCRFS1
ABHD16A
ATP1A1
P4HB
UFSP2
DEAF1
RCOR3
RPP21
MRPL34
EBLN3P
MRPL22
MRPS14
PHLDA3
MRTO4
DNAJB11
PDCD4
HIBADH
OSGEP
METRN
PIGBOS1
ZNF680
EGR1
HAX1
VEGFB
RNF7
ATL2
POLR2K
AP2S1
H2AFX
ATP5MG
DMAC2L
LGR4
GATAD1
PIGT
NPAS3
MRPS15
NFKBIL1
PEX2
MPP5
DDX1
CAMLG
NME7
TMEM126A
CUEDC2
SNX17
KIAA2013
TMEM223
ACAT1
ANXA5
PNP
RPL27A
RPL18
TMEM80
SERPINB1
FNDC4
RUFY3
RPL26
RWDD4
ARMC10
DCTPP1
SRP19
MGST3
ST13
CYHR1
SCRN2
GLRX5
MPC1
PRKRA
SFXN4
HEXB
TENM1
IFT43
EMILIN2
STRADB
ZNHIT1
ZFPL1
ZNF483
FNBP1L
TENT5A
TIMM17A
KAT8
LIPH
BTG3
APOC1
ZNF385A
PSMG4
MLXIP
AKIP1
WDR18
SYCE1L
ABHD8
MPDU1
ITGA9
C8orf82
MEGF9
CAMTA1
ZSCAN16-AS1
SUMF2
TCEAL9
NOTCH2
ENOPH1
PDRG1
YTHDF2
GTPBP6
ARHGAP5
XPA
LARP1
EEF2
UQCRH
IGFBP6
C11orf54
DPP4
C17orf49
DNTTIP1
ECHDC1
G6PD
UXT
STK32A
USE1
GAA
CHKA
VASN
SYS1
AKT2
SH3GLB2
RPS5
MITF
NELFE
MLST8
PAGR1
DCAKD
RNASET2
SCYL1
LMO4
RNF167
NDUFS7
TP53RK
ATP13A3
TSPAN13
C11orf49
GOT1
HLA-DMB
TMEM107
M6PR
TMEM258
KAZN
GADD45GIP1
NT5DC1
ARL5A
RAB3IP
GTF2IRD1
B4GALT7
SERP1
COPS6
NNT-AS1
RBBP7
CDC26
C5orf15
RPL4
MTFR1L
NIT1
FAM50A
LONRF3
PGM1
COPS5
RBX1
UBB
ACTR10
SNX24
FARSA
CYB5R1
COX7B
PSMD6
ZNHIT3
RPL41
RPL37A
NSFL1C
LACTB2
PCCB
HAGH
MIR99AHG
TCTA
TMEM60
DYNC2LI1
MRPS18C
MRPL9
FANK1
CYB561D2
GCLM
PIN1
DYNLT1
PER3
GLB1
GET1
SNRPD2
DNAJB9
ZNF32
RPLP0
TMEM256
ORMDL2
ALG2
POP4
COX20
NELL2
ZNF330
HADH
LMTK3
C1orf115
PAWR
COX17
CISD1
BAIAP2
POLG2
VDAC3
KDM5B
TEX9
RNASEH2B
CYSLTR2
SLC39A6
SLC35F5
PSMD3
WDR61
LSM2
GRN
DHRS1
OCIAD1
PHKG2
VPS35
UBE2E3
MRPL28
RMDN1
MCRS1
LZTS2
SAMD4A
KYAT3
TMEM222
AK3
CAAP1
KAT5
PTOV1
HNRNPH2
NIPAL3
NUBP1
ADIPOR1
CEBPD
WDR46
RPS26
PSMB7
TMEM101
EAPP
PSMG2
PSMC1
PSMD2
COX11
VPS4A
PTPN13
AIMP1
POLR2E
BOLA1
PPIH
NIFK
AC027644.3
MRPL37
SOX6
METTL23
OLA1
CALM3
UBFD1
QTRT1
SCARB2
OSGIN2
SLC25A36
PARL
RNASEK
NCSTN
TIMMDC1
PDCD2
MYO5C
MTX2
JMJD8
BEND7
FLOT1
PTP4A2
RPF2
ZNRF1
NOB1
U2AF1L4
PRKCSH
CAPNS1
ERGIC2
MRPL15
GOPC
NUDT16
GAR1
THOC7
TAF9
WIPI2
PTGES2
CANX
OXA1L
OSTC
THOC6
TIMM17B
TOLLIP
ZNF462
ERLEC1
DUT
INTS10
ZHX1
COQ5
LRRK2
NDFIP1
MRPL50
TSFM
CCDC59
IRS2
CCDC124
IFT27
YAP1
ZYG11B
HMG20B
EPHA2
SLC39A14
NUDT3
NRCAM
TIMM10
CDK16
RPS14
TSGA10
TIMM9
ZBTB4
RPL8
UBE2V2
TP53BP2
PPIL4
UBXN1
FASTK
FBXO21
OSER1
CHTOP
MAD2L1BP
RBM7
GNG10
BMPR1A
PYURF
RPSA
SDHD
ATP6V1B2
TMEM126B
EXOSC5
MRPS28
ARL14EP
IDH3G
TXNL4A
TCEAL1
CDC34
RBBP6
RNF13
PSMA4
DHRS7
ARL13B
MRPL49
C1GALT1C1
PLS3
HNRNPA1
NAGK
DENND10
RTN4
SORT1
MMADHC
ZCCHC17
CCDC43
NFKBIZ
PDPK1
TMBIM1
MYL6
GSS
MRPS11
VEZF1
ATG3
COMTD1
RNF114
NT5C2
NXF1
CDKN1A
RP9
NDUFS2
CHP1
UBE2F
ALDH2
NOL3
TJP2
UBQLN2
GTF2A2
PYM1
RPS27L
HDGFL2
MRPS2
MGME1
COMMD1
UQCRB
TM2D1
MAF1
DEXI
DHRS12
CDKN2AIP
ERI3
YDJC
MROH1
SSR4
CLPTM1
RPL7L1
ATP5ME
UBA5
EIF4A2
NFU1
SYTL1
GCNT1
SNRPF
FRMD4B
DNAH14
NABP2
EIF5A
PQBP1
CLPTM1L
RARS
CFAP20
ZNF581
SLIT3
RAB13
EIF3E
FRA10AC1
PPIL3
TMEM123
ATP6V1C1
MDP1
DCTN6
NDUFA10
CREBL2
CPNE1
CFAP97
SOX4
ST3GAL1
MRPL45
GSTM3
DMAP1
PPA2
MRPS10
MOAP1
ZC3H15
MYCBP
LAMP1
KLHDC8B
RBMX2
NECTIN2
KXD1
KDELR2
EMC2
MRPS12
MICOS10
CEP63
PCSK1N
FLNB
C11orf68
ACBD3
NME3
ZNF274
ATF5
IPP
NBDY
RAB5IF
SNX4
RPL22L1
FLCN
[truncated: 1,585 more rows]

## Sheet: Table S4
TCGA-DEG
AOC1
TFPI
HSPB6
CRLF1
TMEM132A
TNFRSF12A
ALDH3B1
CCL26
GGCT
PROM1
BAIAP3
SYN1
ADAM22
TENM1
MLXIPL
GIPR
MRC2
PLAUR
DCN
LTF
ALOX5
MAMLD1
MTMR11
BID
IL20RA
MARCO
FHL1
AGPAT4
MYOC
DEPDC1B
VCAN
RAB27B
TNC
EPHA3
NFE2L3
COL23A1
FSTL4
ENTPD2
CBLN4
CCDC85A
PKP2
PRDM1
RASGRF1
COL11A1
LZTS1
CDH3
ATP2C2
NGFR
CDON
ERBB3
NGEF
MPPED2
SYT1
FGFR3
PLA2G10
HES2
RAB27A
FSTL3
RPS6KA6
TRPC5
P4HA2
CYP2W1
TP63
IGF2BP2
CA12
IPCEF1
WSCD2
CACNG4
ACACB
RAP1GAP
PAK3
CAPN6
FBLN1
FGF20
BRINP1
CLUL1
DUSP13
SLC4A4
IGSF9B
LRP2
KCNK2
WNT11
FOLH1
CEACAM6
FAT2
NOX4
TMPRSS11E
PHACTR3
SULT2B1
FER1L4
CPXM1
TESC
FXYD5
ICAM1
NRCAM
SLC26A4
TGM1
TYRO3
FMO2
TBC1D2
SMIM24
CBARP
MISP
PALM
MMP11
SEPTIN3
RASD2
PNPLA5
UPK3A
TCL1A
DHRS2
BIRC7
NKAIN4
EEF1A2
RSPO4
E2F1
SYNDIG1
CELF4
NOL4
CHRDL1
SRPX
SCML2
PCSK1N
PHEX
VGLL1
CD40LG
TIMP1
ARMCX3
SLC25A15
TSC22D1
MSLN
CBLN1
CCL17
HAGHL
CTSH
OCA2
FAM189A1
RHOV
STMN2
TUSC3
KCNN4
DHDH
KLC3
RETN
EPHX3
CCNP
CLIP3
SLC1A5
BBC3
ICAM5
CNFN
SIGLEC6
SLC5A5
COMP
MAG
TMEM59L
HPN
SCN1B
PBX4
DLX5
MET
NOD1
CRHR2
NPTX2
AGR2
CORO2A
TGFBR1
OGN
TLE4
AK1
NPDC1
UNC5B
SPOCK2
DKK1
CSF3
COL1A1
ABCC3
HLF
FAM20A
CWH43
ODAM
SMR3A
NMU
GALNT7
SOD3
GLRB
PPARGC1A
CRYAB
CTSC
ZBTB16
B3GAT1
DTX4
CCND1
FOLR3
UPK2
MDK
SLC35F2
CALCA
PRMT8
CUX2
ART4
RERGL
ADTRP
TPD52L1
ULBP1
KHDRBS2
PDE10A
MDFI
SMOC2
SRF
PCDHB2
C7
GHR
GZMK
CDH6
SLC27A6
LIFR
HGD
CLDN16
COL7A1
PLSCR4
PLCH1
CCL20
TFCP2L1
SLC30A3
FNDC4
EVA1A
EFEMP1
FN1
GNLY
TPO
PROC
QPCT
KISS1R
CD207
ANGPTL1
ELAPOR1
CTH
NT5C1A
HPCAL4
ST6GALNAC5
MFAP2
PLA2G2D
GBP1
GALE
CR2
PROX1
NRP2
ATP10B
CCN2
DNAH7
NR4A3
NPC2
TNFSF18
SMAD9
TGFBI
EGR1
GLT8D2
DUSP4
ABCC11
GJA3
TBX22
FMOD
SFTPA1
PLAU
EGR2
NECAB1
NR4A1
COL10A1
G0S2
KCNJ2
GPR83
SLPI
SDC4
PSG8
GRM4
UNC5CL
TREM1
SOX4
RUNX2
EREG
MYRF
PIWIL1
GPR18
TMEM255A
CD70
FOSB
FOXA2
BMP2
PCSK2
LAMP5
CITED1
BPIFB9P
BPIFB1
F10
CCR7
NR1D1
FLRT1
SSX1
AIF1L
OMD
BCL11B
TSPAN8
FGL2
SPINK2
VPREB3
MGAT3
KRT17
CDHR3
VGF
FOXP2
KLK10
FOXJ1
APOE
APOC1
DPP6
KLHDC7B
PXDN
GDF15
TNNT3
COL5A1
FIBCD1
NPAS1
ULBP2
SYNE1
C1QL1
PYY
HIGD1B
NAPSA
PDLIM4
PPP1R1B
LGALS3
MATN3
EMILIN2
RAMP1
PTPRE
ITGB4
MATN2
VSTM2L
CHI3L1
MYBPH
CCNA1
POSTN
KL
BEX1
GGT2
NTS
LRRIQ1
ARNTL
LYVE1
LOXL2
MRO
TSPAN2
GSTM5
VTCN1
SPX
LRP4
SPOCD1
DSC3
TCN1
C5AR2
CLDN10
HRK
CCDC146
KCP
RDH5
KRT87P
HEY2
SLC9A5
RGS8
WNT10A
PLXNC1
TBC1D4
SCEL
TNS3
MYO1G
GALNT5
BLK
IL36RN
TMOD1
GABBR2
CCL21
IGFBPL1
FHDC1
TMPRSS4
MMP7
TRIM29
POU2F3
MMP13
ITPKA
STRA6
CLCA2
CYP1B1
TRIM54
DUSP5
ENTPD1
PLA2G12B
OIT3
ADAMTS14
AOX1
HCN4
ARHGAP24
MMRN1
PDE5A
FRAS1
B4GALNT3
ERP27
PIANP
AMIGO2
DUSP6
RDH12
CCDC33
NTRK3
MFGE8
CDH11
CDH13
IRF8
PRELID3A
TMC6
MAPK4
GRB7
PNMT
PLPP2
FCN3
SYTL1
CCN1
RXRG
DPT
NECTIN4
CRABP2
RGS16
FAM163A
ECM1
SUSD4
REN
HES6
STAC
IL17RD
LRIG1
TMEM108
STXBP5L
ANK2
NKD2
HAPLN1
SPATA9
CXCL14
GABRB2
TNFRSF21
FAXC
SDK1
IGFBP3
SYTL5
IGSF1
ARHGAP36
GPC3
CSGALNACT1
SLC26A7
CDKN2B
CDKN2A
SHC3
SLC25A25
LCN2
ADAM12
ADM
LRRC4C
NCAM1
GRIK4
ADAM33
MPZL2
CDH22
HMGA2
CNTN5
MKX
FAM124A
GPM6A
DLG2
PRSS23
PPP1R1C
ITPR1
THRSP
EPS8
CENPJ
GFRA1
GLT1D1
TMEM132D
TMEM163
CYSLTR2
SH2D6
SPOCK1
OLAH
TRIM36
ADGRA3
PLA2R1
ADGRF4
PLEKHG4B
LURAP1L
PID1
SEMA3D
DNAAF1
ABI3BP
FAM167A
CCDC173
PDLIM3
SORBS2
PDE1C
EPHB1
GOLGA7B
DEPTOR
ELMO1
ADCY8
AFF2
PSD3
WIF1
MMP16
TIAM1
TDRD9
CD109
MS4A1
B3GNT7
TMEM171
KIT
PWWP3B
DGKI
SLC34A2
ACAN
RADIL
TRIM63
GRHL3
TENT5B
SHROOM4
CD1A
CDA
LAD1
RCAN1
RUNX1
CARMIL2
TFF3
TFF2
TFF1
TMPRSS3
PDE9A
S100B
BRSK1
FCRL3
LY6E
COL26A1
SCGB3A1
GRIN2C
FAM171A2
PLCD3
AQP5
IP6K3
SHANK2
PDZK1IP1
DRAXIN
DHRS3
CAMK2N1
MXRA8
DIRAS3
B3GALT2
HFM1
LRRC52
KLHDC8A
FCMR
LRATD1
SPATA18
CFAP221
INHBB
BNIPL
C1QTNF7
S100A11
IVL
TGFA
CLDN1
INAVA
LMOD1
ELF3
TRIM46
TMEM79
ADORA1
TRAT1
ADAMTS9
PCOLCE2
CXCL5
CPA3
UCN
SLC6A20
GRIK3
KLF15
CAMK2N2
LIPH
ITGA2
EDIL3
RANBP3L
ADGRV1
F2RL2
ESM1
FOXQ1
CSF2
CITED2
PI16
TNFRSF11B
SBSPON
TMEM184A
CTHRC1
DCSTAMP
DIRAS2
ZMAT4
MAMDC2
SVEP1
RNF183
CLDN2
PKNOX2
AKR1E2
CLMN
PDZRN4
ABTB2
SPINT1
AVPR1A
TMEM100
NETO1
IFTAP
WDR72
CRABP1
TMEM130
PRTG
MFAP4
BEAN1
CDH16
BMERB1
YPEL4
SCG5
B4GALNT2
TMEM92
ART5
CDT1
CYP2S1
CDC42EP5
SEMA6B
GGT6
KLK2
KLK5
KLK6
KLK11
KLK13
KRT80
IGFBP6
GSDMA
DNASE1L2
SCARA5
RHOH
KLHL30
TNXB
PHYHIP
SERINC2
UGT3A2
LRP1B
CA7
FAM178B
SFTPB
KLK7
IRS1
ACTBL2
ROR2
CPT1C
GPRIN1
STK32A
RNASE2
CXCL8
RASSF6
SPRR1B
GPR183
BNC1
TM4SF4
TM4SF1
ZFPM2
RNF150
ADRA1B
FOS
CST5
CST2
CST1
SEMA3E
METTL7B
KISS1
LONRF2
CDH2
SDR16C5
HS6ST2
ALK
SIGLEC17P
OBP2B
FUT3
LRG1
SOSTDC1
KRT19
KRT15
TPPP
APLN
KRT13
KRT27
SLC25A33
ENC1
P2RY6
ANO5
BCL2
COL8A2
FRMD5
MIR31HG
GAP43
CALB2
FRMD3
TPSAB1
NEGR1
MACROD2
ZMAT3
CCL19
MYEOV
SYT12
SAA1
AGR3
TNFRSF10C
HAP1
SPTBN2
SLCO4C1
PHLDA3
PODN
ZCCHC12
LINGO2
GCSAM
GOLT1A
KY
RIN1
SLC66A1L
SEZ6L2
ASPHD1
CD164L2
CHST2
DES
CATSPER1
CST6
GRAMD2A
LPL
LONRF3
SFN
ETV4
DOK7
PLEKHD1
ACBD7
RIMS2
PRR15
TCIM
FIBIN
B3GNT8
LRRN4CL
CD19
JUN
GOLGA8Q
GLDC
CTXN1
ERFE
TMEM139
SMIM10L2A
NSA2P3
CDH4
FJX1
SLITRK4
ALOX15B
ARL14
B3GNT3
TDRD6
SERTM1
H2AW
CCL13
UTS2R
FDCSP
TNFSF15
PHLDA2
PLAG1
ADIG
FAM181B
GABRG3
ZNF804B
NXPH4
XKRX
EPHB3
SNORC
NTM
HCAR2
ODF3L1
MCEMP1
CSMD1
RIPPLY3
PRR36
EPHA10
SYNDIG1L
BMP8A
UPP1
OPCML
MACC1
EMILIN3
FAM3B
IQGAP3
ARSI
SH2D1A
NPW
TBX1
KCNQ3
ADRA2C
C1QTNF12
ALDH1A3
TACSTD2
COLEC10
PTP4A3
PROS1
LPAR5
STING1
NELL2
TCEAL2
CLCNKB
IFNE
ANKS1B
MANEAL
FAM43A
NOTUM
SFTPA2
HS6ST3
KRT6B
MUC1
AHNAK2
NAT8L
LEMD1
BTLA
ANKRD37
GLDN
KLK12
FOXI2
KRT16
SELENOV
KRT14
QRFPR
ESPN
TMPRSS6
SLIT1
GJA4
PLEKHN1
SAMD11
SLC18A3
GABRD
RTL4
NWD1
TMEM215
IER5L
HBA2
FBLL1
CC2D2B
PLA2G2E
SHISA6
ENTPD8
LRRK2
GJB3
LIPI
FAM111B
APOD
NUGGC
FAM180A
CXCL17
GJB4
IL1RAP
S100A4
KIF19
GREB1
RYR1
SFTA2
CD55
CPNE4
NUDT11
PRTN3
S100A5
ESRRG
LAMA2
MMP1
ADH1B
HRH1
FAM180B
CLPSL2
S100A2
LAMB3
SIGLEC15
SERPINA1
TPSB2
HMGA2-AS1
OGDHL
COL13A1
SLC28A3
DMBX1
DPP4
CFAP43
CFD
AC011450.1
S100A6
ZNF560
LPAR1
PEG3
C2CD4A
ARC
RYR2
TAFA2
PAPSS2
EGFL6
RASSF9
BRINP2
PNP
PAX9
SUCNR1
TOX
DMD
TGM2
RNU5F-1
RNU5A-1
RNU6-403P
RNA5SP515
VTRNA1-3
MIR146B
INF2
LINC02408
RAET1G
SAMD5
TCEAL5
ARMCX7P
MAFB
NHSL2
LAYN
LY6G6C
MUC21
LRCOL1
HLA-G
MROH6
IGFL2
ATP6V0E2-AS1
CD177
PRSS1
SPIRE2
PKHD1L1
MT1A
CFI
KRT6A
CRLF2
ZDHHC11B
EGFEM1P
RNU1-138P
RNVU1-30
RNVU1-15
RNU6-30P
RNU6-2
MIR222
MIR221
MIR138-1
DIO2
TRBJ2-2P
TRDJ1
TRDC
IGHE
IGHV5-78
AC135178.1
KRTAP2-3
AC084880.1
NOC2LP1
KRT222
CLDN9
AC078899.1
PGAM1P4
LINC00887
SEC14L6
AP002358.1
FER1L6
APOC1P1
C5orf49
UBE2QL1
AC011298.1
TAFA5
SSR1P1
RNU6ATAC18P
PLXNA4
NPTXR
MYBPHL
C10orf55
RNY3P8
TMSB4XP3
TINCR
LINC02593
AC007255.1
LINC02471
MIR181A2HG
UBE2FP1
HAGLR
EIPR1-IT1
AL353150.1
LINC00092
LINC01770
LRRK2-DT
MKRN2OS
WARS1P1
AL121574.1
ELFN1
ABHD11-AS1
FTCDNL1
HAGLROS
LINC01918
TRBV2
AC007365.1
AC005082.1
AL158166.1
ST7-AS1
AL355607.1
MYADM-AS1
MIR646HG
MIR34AHG
AL033519.4
AC141930.1
HCG22
ELOCP20
AL137026.1
TCERG1L-AS1
AL022316.1
AC012462.3
LINC01614
DPP4-DT
ZNF826P
ITPR1-DT
AC105450.1
PSG1
AC253536.3
AL008707.1
AC107057.1
AC006970.1
AC093797.1
AC007743.1
HNRNPA1P27
LNCTAM34A
AC090505.1
AC062015.1
BX842568.3
AC011247.1
AC018816.1
AL135791.1
SMAD9-IT1
AL162411.1
NR2F1-AS1
CATIP-AS2
LNCNEF
LRRC52-AS1
UNC5B-AS1
AL365259.1
AL035425.1
OR2I1P
SNORD13
C1orf226
LINC00973
AADACP1
RPL22P2
AC018450.1
RPSAP52
LINC02082
RPS29P11
PCDHAC2
AC119424.1
C4orf48
AC078882.1
ETV5
OR2A1-AS1
PTCHD4
HBB
LIFR-AS1
LRP4-AS1
LINC00926
INSL3
AC010226.1
LINC01586
AC106795.2
LINC02276
TRMT9B
STK32A-AS1
GPR162
AC025419.1
AC125807.2
LINC02600
AC244502.1
AC093866.1
AC135352.1
OR7E28P
C8orf88
TPTE2P1
AC103957.2
AC090739.1
AC091563.1
AC120036.3
MEX3A
SLC25A47P1
AF131216.3
ABCC6P2
NOX5
AC120036.4
LINC02718
AP003174.1
AC022509.1
AC063926.1
ADGRD1-AS1
AC022509.2
LINC02454
ABCC6P1
AC026369.2
SLC5A8
AC084375.1
HP
PPP1R12A-AS1
AC025154.2
AC012038.2
AC078864.1
AC026116.1
MKRN9P
LINC02461
AL079303.1
RAP1AP
CKS1BP1
AL162511.1
AL355916.2
AC005479.1
AC244502.3
AC025580.1
CTXND1
AC104574.2
SLC22A31
NR4A1AS
FIGNL2-DT
AC120498.1
AC132938.1
AC120498.3
AC127455.1
AC126773.4
CEROX1
AP005233.2
AL158206.1
AL031985.3
LINC02555
DOCK9-DT
AC004847.1
EPPK1
AL031710.1
AL035425.3
AC009132.1
AC006058.1
AC040160.1
LINC01977
AC110285.3
AC115099.1
LINC01975
MIR5685
MIR3189
RNU4ATAC
AC005725.1
AC004585.1
MIR3178
GDF10
AP001029.1
AC090409.1
KCNJ2-AS1
AC079210.1
LINC01836
RUNDC3A-AS1
SLC6A14
LINC02560
AC078899.3
BNIP3P18
AC078899.4
SPIB
RNF225
MEI4
AC005479.2
AL451085.1
AC009549.1
AC008555.3
AL034374.1
AC012213.4
AL096865.1
AC012467.1
AC016405.2
AC004233.2
AC016405.3
AC010857.1
AC254633.1
AC092954.1
TBC1D8-AS1
AC107294.1
AC093865.1
AL355312.3
AC016717.2
AC107294.3
AL135999.3
RNVU1-27
AJ011932.1
AC004233.3
AC080038.1
AC023043.4
ARHGAP23
PRSS2
YWHAEP7
AC068234.2
MIR6730
AC002401.4
AC026124.2
MIR6784
SRCIN1
AL138999.1
RNVU1-4
AC026368.1
AC107308.1
FAM247B
SSTR3
MIR6071
BANCR
AC092645.1
AC098476.1
AC027601.4
AC080188.2
AC135584.1
AC109326.1
AC063926.3
AC026748.3
AC006058.4
AP000851.2
TRBJ1-4
TRBJ1-3
TRBJ1-5
AC119427.1
C13orf46
AL928596.1
AC141930.2
FAM247A
AL391650.2
AP000867.4
AC063960.1
AL133482.1
AC104472.4
AC092623.1
AL353138.1
AC105052.5
AC000085.1
THCAT155
AC093599.2
AC051635.1
AC005865.2
AC068279.2
AL050338.2
AL035409.2

## Sheet: Table S5
Macrophage
TYROBP
FCER1G
AIF1
PLEK
SPI1
LYZ
LST1
MNDA
IGSF6
HLA-DQA1
CYBB
FCGR2A
MS4A7
LAPTM5
CD86
BCL2A1
ALOX5AP
CLEC7A
C1orf162
SYNE2
CD68
SLC8A1
C1QA
CD53
MS4A6A
LY86
OLR1
C1QB
ITGB2
PLAUR
CD37
LCP1
PHACTR1
FGL2
KYNU
PTPRC
CSF2RA
DOCK2
HCK
NCF2
C1QC
IL1B
ALOX5
CSF1R
CAV1
TBXAS1
CD83
CALD1
MSR1
SNX10
NFIB
TJP1
ITGAX
LCP2
EVI2B
LAIR1
CIITA
HLA-DRA
IFI30
LAT2
HLA-DQB1
HLA-DPA1
CALHM6
ARRB2
HLA-DMA
CCL3
IL18
LBH
APBB1IP
NCKAP1L
PLS3
HLA-DMB
ARHGAP29
CAVIN1
RBPMS
RGS10
HAVCR2
SRGN
TNFSF13B
COTL1
2024-03-01
FPR1
ADAP2
TFEC
FCGR3A
IRF8
MS4A4A
CXCL8
PARVG
FYB1
HCLS1
TLR2
GPSM3
NCF4
SLC15A3
MRC1
LGALS9
HLA-DRB5
WAS
SIRPA
STX11
CCDC88A
OGFRL1
BTK
SLCO2B1
LILRB4
CD84
HLA-DPB1
EPB41L3
SKAP2
CSTA
HLA-DQA2
RGS2
HLA-DOA
TGFBI
GPR183
RGS1
DAPK1
CCL3L1
TREM2
DOCK4
GMFG
PYCARD
CD4
CD163
RNASE6
ADA2
GLIPR1
C3AR1
MCTP1
LY96
LYN
PIK3AP1
B3GNT5
NCF1
GK
FERMT3
PLEKHO1
SLC7A7
C5AR1
FPR3
CD14
SH2B3
PILRA
CXCL16
RASGEF1B
HLA-DRB1
AP1S2
KMO
TMEM176B
GPR34
RGS19
HMOX1
P2RY13
PLBD1
SAMHD1
CTSS
KLHL6
MAP3K8
EVI2A
PTAFR
WDFY4
C15orf48
CSF3R
ST3GAL6
FGD2
RAB32
MYO1F
MPEG1
TYMP
PIK3R5
CCL4L2
TLR1
PTGER4
RTN1
BMP2K
SYK
GNA15
S100A9
F13A1
BCAT1
MANBA
LRRC25
IL6R
ARHGAP30
IL10RA
CASP1
IRAK3
CD33
HPGDS
CD300A
FMNL1
GNA13
ALDH2
OTULINL
GAS2L3
RIN3
IGFLR1
CCL4
ADAM28
NEK6
ADCY7
DSE
CLEC12A
RAB20
RHOG
FCGR1A
MFSD1
RASSF2
FAM49B
C9orf72
SGK1
ACSL1
GPR65
KCNMA1
ITGAM
JAML
PLD4
MAN2B1
ATP8B4
FGR
FCGR2B
FOLR2
C3
BIN2
SCIMP
TREM1
PPIF
KBTBD8
DAB2
CYTH4
HNMT
CCRL2
SLC31A2
GRK3
PLXDC2
TLR4
SLC1A3
VSIG4
LHFPL2
DAPP1
EMILIN2
CLEC4A
NLRP3
MOB3B
P2RX7
OSM
PTGS1
GM2A
GPR132
OSCAR
LILRB2
LILRB3
PARVB
LILRB1
VAV1
KIAA0930
DMXL2
IL4I1
CXorf21
NPL
TSPAN33
PIK3CG
TNF
RNF130
TTYH3
HACD4
RNASET2
TM6SF1
TMEM176A
ADGRE2
ANKRD22
TRPM2
MPP1
CEBPA
DOK3
SLC37A2
SELPLG
LRRK1
IL1RN
CTSZ
PLCB2
CD300LF
SLAMF8
CPED1
MICAL1
CCR1
TMEM52B
MIR155HG
HCAR2
SIGLEC9
PAPSS2
AC004687.1
LINC01010
HCAR3
CSF2RB
SLC11A1
GAPT
PSTPIP2
SPN
TMEM273
SIGLEC10
ADAMTSL4
NFAM1
CLEC5A
PALD1
CARD9
SH3TC1
CD74
S100A8
RGS18
IL10RB-DT
ARHGAP22
SLAMF7
AC025580.2
AL390957.1
CD80
CLEC10A
TLR7
RGS13
SDS
GRN
SNCA
TNFAIP8L2
MCOLN2
STAC3
CX3CR1
HLA-DQB2
PID1
ARL11
SMIM25
LINC00877
CLECL1
RENBP
NAMPT
LITAF
STAB1
SNX20
IRF5
ARPC1B
PSAP
ARPC3
CYBA
OAZ1
FTL
TMSB4X
FTH1
ACTB
MALAT1
TET2
CAV2
RELT
MFSD12
CPE
KCTD12
IRAK2
S100A11
HVCN1
PRDX2
CST3
ADIRF
DOK2
ARHGAP4
PYGL
SLC43A2
ZNF267
SOD2
DSTN
SPARC
CAPG
CORO1A
TNFAIP2
RORA
LYL1
SNX8
DOCK8
ZNF804A
IKZF1
PRKCB
FCGRT
KCNMB1
CNN3
DOCK10
THEMIS2
TPP1
LIMS1
NFKB1
AOAH
CFD
IL17RA
RBMS3
CRIP2
TSC22D1
KCNAB2
GZF1
SPTBN1
MYO9B
TAGAP
SLC16A3
PAG1
TNFSF13
SASH3
LPXN
FMN1
ATP6V1B2
FUOM
ELMO1
EIF4EBP1
GPNMB
MGAT1
PLCG2
AP1B1
UACA
ABR
IGFBP5
LMO2
RIPK2
RAB31
GCA
ID1
PDLIM1
NAGA
GRB2
OTUD1
RASSF4
PDE4B
TEX14
ARRB1
PBX1
GLA
ENPP2
SDCBP
SORL1
TOM1
PPT1
TIMP3
PPARG
EEPD1
AC009093.2
ATP2B1-AS1
GAB2
MB21D2
ZEB2
PLPP3
TPRG1
SELENOM
MYL9
FERMT2
BASP1
ID4
ACTR3
BEX3
SAMSN1
SELENOW
KIAA1217
NCKAP1
RNF149
ATP6V0D1
LSP1
REL
SLC16A10
MAGI1
PDE5A
AC099489.1
YAP1
CD72
ACTR2
CD48
PLSCR1
NTRK2
FNIP2
INPP5D
PAK1
LACTB
PAM
PARD3
RAPGEF1
HOPX
EAF2
PLOD2
KRT18
CSK
TEAD1
DOCK9
FBP1
RHBDF2
ARPC2
ADGRF5
LIMCH1
FYN
IRAK1
SOAT1
HCST
NFIA
SH3BGRL3
MXRA7
TRPV2
PRSS23
TSPO
MXRA8
CLIC3
DLC1
CTNNAL1
AKR1B1
TMEM51
TBX3
COLGALT1
NPNT
APP
APBB2
S100A13
ABCG1
EID1
NCOA4
PTPRG
PERP
RCSD1
CELF2
VASH1
CD22
PAWR
RASSF5
FKBP15
JAK2
PFN1
CD320
SMAP2
GAS7
ARHGAP24
YWHAH
KRT8
CARD16
AP003086.1
TG
NR4A3
SLC25A19
ZBTB20
PATJ
MYO6
C2
SPRY1
NFKBIE
ABCA1
BCAM
KDM6B
COL8A1
LRMP
CYTIP
LIMD2
CLDN4
CCN1
CCL2
CORO1C
NEBL
PPFIBP1
WDR91
CDH1
EPHA4
EPCAM
ARHGAP25
SH3BP1
HPS5
SLC8B1
MYD88
CTTN
AK1
NAAA
PDE1A
ECRG4
PKP4
WIPF1
MFGE8
CLDN3
KRT7
NABP1
GSAP
MT1E
OCIAD2
DSP
IGFBP6
CCND2
WWTR1
ABCC4
SETDB2
MARCKS
MGAT4C
TINAGL1
GMIP
LAMC1
MCOLN1
SHROOM4
CNPY3
SFTA3
TAOK3
INHBA
NFKBID
ATP5F1E
NKX2-1
TMSB10
GNAI2
CASP4
RASGRP3
CCSAP
EMP2
RP2
ALCAM
LTBP3
IFNGR1
ECE1
RUNX1
CLU
PLIN2
TMEM98
ARHGAP15
EGFR
FAR2
SORBS2
EFEMP2
P2RX4
ST6GAL1
FGD4
BNC2
CEP170
SNN
DAPK2
S100A16
CHST11
ZNF385A
MACF1
BID
CCND1
ABL2
PTPRK
GNG12
LMO3
GLIPR2
TRIO
S100A14
ZYX
CCN2
SH3BGRL2
STK10
BACH1
CD59
SLC31A1
MTUS1
RAC2
FRMD3
ANKRD44
MDK
EFHD2
ABI3
MET
NPDC1
MCF2L2
MTHFD2
CMTM8
HDAC9
MGAT4A
SELENBP1
GNB4
ASAP2
NAIP
MAOA
GPR137B
TSHR
LSR
G0S2
PTGS2
CD24
CFAP36
MUC15
MBP
ATP2B1
PTPRM
CPPED1
SUSD1
TNFRSF1B
ATP2C1
ETS2
NR4A2
RAP2B
GRK2
DMKN
GPRIN3
ADAMTS9-AS2
GPRC5A
ARHGEF12
ODF2L
YES1
ATP6V0B
CPM
S100A1
RASSF3
CYB5R4
ADGRL2
CLEC2B
ITM2A
ACTN4
IGFBP4
MAP2
SOX4
ATP6V1F
PDE8B
TMEM59
CAMK2N1
QKI
LRRFIP1
MYH10
ITGA3
SERPINF1
MGST1
GNAS
RMST
LIMA1
SH3D19
AFAP1L2
SKP1
TRIM14
STK38L
ABLIM1
DCK
SYNGR2
C12orf57
PROS1
TPD52L1
PTMA
ARHGEF6
LCN12
ATP13A4
CREM
ESAM
GLUL
THSD4
SHTN1
CD93
DENND5A
TANC1
PAX8
ANXA5
KAZN
SCO2
SOD1
PRICKLE1
KLF5
CMTM6
RPS4X
CIRBP
RPL24
MGP
DPYSL2
SNRPN
SLC12A2
METRNL
MAL2
NUCKS1
PDXK
SMCO4
LCA5
KRT19
MLLT3
RPS6KA1
DOK1
AP2S1
ZFYVE16
SDC2
EPS8
ACP5
DENND3
NELL2
PEBP1
SERPINB9
EFNA1
SNHG14
SERPINB8
OCLN
ZNF462
NANS
ELF3
LMAN1
IL13RA1
PPP1R13B
RNF166
GPRC5C
RAB25
CAP1
AP003498.2
SH3BP2
GJA1
MAGI3
CD151
DUSP2
PLAU
FOXN3
EPB41L5
EIF4A2
VOPP1
AC103591.3
AXL
IGF1R
EPN2
PTPN14
CTSH
RASEF
PNPLA6
TPM3
TRIM2
FNBP1L
AP1M2
SBDS
TDRP
PPP1R9A
UPP1
RCN2
NECTIN3
RELB
CCDC112
PDCD4
MPZL2
ASS1
LTC4S
ARSB
OPN3
GOLGA8B
MOB1A
GRAMD2B
ERRFI1
SCD5
RGL3
PTK2
RBM47
ARL8B
SESTD1
ZNF710
VASP
LPCAT1
PDLIM4
EPB41L4A
TMEM30B
ADGRG1
KCNJ16
S100A4
KANK2
NR3C2
UTRN
PGRMC1
PARD3B
TNFAIP8
PPP1R14C
PTPN18
EMP1
BRI3
UNC5C
PPARD
INSIG1
TENM1
PREX1
ARL4C
NR2F2
MTMR14
SLC7A2
MOB3A
MAP2K1
CRIM1
SLIT2
ADAMTS1
MEF2C
MX2
SLC9A3R2
PLA2G15
ARHGAP42
KMT2A
UNC93B1
COL14A1
CACNA2D1
H2AFY
UBA52
SMARCA1
PLAGL1
ETS1
CRYAB
IER3
ARHGAP45
PPP1R18
YBX1
NRIP3
WWC1
IFNGR2
STXBP2
VEGFC
ARPC5
ICAM1
COX7A1
PTPN13
MAGED2
RPL3
PLTP
S100A10
ZSCAN18
DRAM1
ENAH
RCC2
ID3
NAGK
IPMK
CXADR
NHSL2
BEX2
ZBTB7C
CCDC88B
STX7
DRAM2
DISC1
OAS1
ALDH3B1
WDR81
TMEM245
IYD
AKIRIN2
TPM1
TENT5C
TM4SF1
TBC1D7
FES
KDM5B
ITGA9
NFKBIA
M6PR
MFNG
VAMP8
DSG2
NDUFC2
CAMK1D
AGAP3
LAMB1
PDE4A
MPHOSPH8
FAM102B
AKT3
NMB
TESC
PCYOX1
PBXIP1
HOTAIRM1
DDR1
BTN2A2
GLRX
TUSC3
NID2
HACD3
FABP5
NAV2
TWF2
CMTM3
HSPB1
WFDC2
IFT57
PABPC1
USP36
CXCL2
IGF2BP2
ITGA4
FUS
PLEKHO2
CITED1
TMC4
TMEM54
ETV3
AP5Z1
PLXNC1
LFNG
AC008105.3
PIK3R3
SPTAN1
C16orf89
TACSTD2
GNS
LTBP4
FOXE1
SCARB1
IQCK
PKIG
PLEKHA5
EMP3
SIPA1L1
HSP90B1
KIAA1671
JUN
TCEA3
TRAF3
MIR181A1HG
CD109
NHSL1
DEF6
SEC62
TUBA1B
AGPAT4
SNHG7
SEPTIN6
MBIP
RASD1
MXD1
SNTB2
TLE2
LRP1
CFI
PEA15
LY6E
FSTL1
WDR86
PURA
C19orf33
FLNB
RHOQ
TGFB1I1
CADPS2
ATP9A
CLDN7
ADAMTS9
APOC1
DDX24
PLCB4
DUOX2
SLC25A4
LONRF2
TNIK
MYH14
SLC25A23
SRGAP2
IL3RA
FLI1
ERBB2
DUOXA1
MAP9
DOCK3
LRIG3
HEG1
TCERG1L
COBLL1
MPDZ
TRAF1
NETO2
EHBP1L1
EHD2
CD302
ITGA1
GLCCI1
PARVA
VSTM4
GOLGA8A
FBXO32
CST6
AGAP1
SPINT1-AS1
AOPEP
FRMD4A
ACER3
MAP2K3
SGPP1
CD58
TSPAN9
GABRB2
DPYD
GAA
LAPTM4B
NR2F6
PFN2
HMGA2
LAMA5
PPIC
DIO2
SLC26A7
TMEM263
BDH2
TNFAIP3
DCBLD2
MYL12B
SLC7A5
SORD
BMP7
HSPBAP1
DCDC2
DBNL
CCDC80
PRMT9
MYO1B
SLC34A2
ECHDC2
HINT1
CYTH1
SH3KBP1
ITGA5
ME2
CFL1
EDEM1
CTSL
ISYNA1
PGRMC2
ARPC4
RAPGEF3
MCM5
CTSD
PLEKHA4
PICALM
KALRN
UBASH3B
TOR3A
IGFBP7
PECAM1
VASN
ZNF331
MIR100HG
GOLGB1
DDAH1
PLEKHM2
PDGFRL
PTPRF
USP54
ZNRF1
OLFML2A
GPCPD1
LRP6
PALLD
LRP4
SH3BGRL
MMD
GCSH
JADE1
SLC46A3
SFMBT2
SERPINB1
FMNL2
NR2F1-AS1
CKLF
CDC42BPA
METRN
ZBTB1
MKNK1
NXN
ACSL4
SLC1A4
TRABD
MYO5A
ATG7
RRBP1
LDOC1
DTX4
SNX29
MAGI2
P4HTM
COL4A1
TMEM106A
ITGA2
HDGFL3
ARID5A
ZNF667-AS1
HIST1H4C
NPAS3
BSPRY
CMYA5
MARCKSL1
LMO7
CAPZB
TNS2
RBFOX2
GIMAP4
PRCP
NOTCH3
TSPAN13
SDSL
PLPP2
SLC41A1
SNAP23
SOX6
TSPAN3
CSRP2
SLC12A9
KCNK6
LIPA
NFIX
TNFRSF12A
ARHGEF10L
LAP3
ARMCX2
OBSL1
ATP8B1
IFT22
MPRIP
CD52
TM7SF2
NDUFC1
AKR1A1
ARHGEF17
SH3YL1
ADPGK
DENND4B
IQGAP2
TBC1D22A
NRBF2
NCEH1
RAB13
ARL3
IL6ST
HEXB
RNF13
MACROD1
CEBPB
AFAP1
ARHGDIB
DLEU1
RARRES2
DUSP10
GLIS3
CTSC
PPL
EIF4E
ARHGAP26
PLEKHA2
HPN
GPRC5B
FBN1
IGKC
VCL
SERPINH1
DHRS3
PLCE1
HSPG2
TUBA4A
THBD
MAP1B
ASXL1
RAB27A
SPOCK2
LAMB2
C1orf54
ARAP1
SLC12A8
CEP70
CREB5
NSMAF
TNS1
FAM3C
MAGEF1
CMTM4
ITGB1
RPL5
MXI1
TIMP1
DOCK5
ISCU
PRDX5
ATG16L2
SNX30
TSTD1
KTN1
SHROOM3
EIF2AK3
PRKCE
SMIM1
SAMD12
DIAPH2
GINM1
PRKAG2
GADD45A
AKAP12
LGALS1
IL16
MALT1
AC007952.4
VGLL4
JUP
FIS1
IMPDH1
GDI2
PRR15
SRSF7
SLC9A9
FAM160A1
UBE2E2
PCGF2
LTB
PARD6B
DAPL1
ARG2
TBC1D8
EDF1
NADK
NFE2L2
PMAIP1
BST2
ZNF486
ANXA3
SUN1
BSG
C1orf115
CADM1
TSPAN5
ZNF704
DLG2
STX4
PGF
DUOX1
SPARCL1
SLC5A3
DUSP14
CMTM7
MRFAP1
MAPK10
KLF6
SVIL
NORAD
PTPN6
TTC3
ARHGAP18
RIC3
CLUAP1
RND3
CUTA
FCHSD2
INPP4B
NFATC1
SVIP
ATP1B3
ADD3
ATG3
PPM1M
TMEM87A
FAM210A
CFH
IGHG4
DYNC2H1
CAPS
ITGAL
PSTPIP1
MAST4
TICAM1
COL18A1
CDC42EP4
HIF1A
SAT1
INTS6
LRBA
OXSR1
TMED4
AUTS2
SLC25A29
RPL10A
LRP11
SH2D4A
PTPRE
GRASP
STXBP6
PDE4DIP
SERP1
KIF21A
SWAP70
CALM2
ETF1
MOK
TMEM50B
RSRP1
MSI2
BCAP29
MPP7
ARC
MICU3
CCDC170
CFLAR
EEF1D
MYL6B
DSC2
HMGB1
WDR34
LRRC8A
OSTF1
YTHDF3
SDC4
LDLRAD4
RPS6KA4
DYNC1LI2
CAPZA1
MT1X
IGHG3
KLHDC2
MYO5C
CMIP
MYO10
IKZF2
NME3
HEXA
DAD1
EPHA2
FHL1
SON
HSD17B11
BBS9
TTC28
KIF9
KCNJ15
IQCA1
PGD
ACOT9
TRMT1
SRP14
ARMCX3
ABHD14A
BLNK
NDUFA5
LMNA
FAM43A
ZC2HC1A
IL10RB
MRPS6
TMEM106B
TNFSF12
IER5
ORMDL3
SNX25
SLIT3
NIN
RYK
RPL41
MFSD6
WASL
TXNRD1
NCOR2
TULP3
FARP1
OSBPL11
DNMT1
BNIP3
TMEM9
SLC25A33
TRAK2
DHX34
GOLGA4
NUCB2
LTBP2
TOMM20
AGTPBP1
HES1
TERF2IP
SLC4A7
CNPY2
TANC2
TJP2
PRKCI
TNRC6C
SEMA4D
NQO1
OPTN
DAG1
ITPR2
GNB5
TPK1
DBI
CREG1
ZFAND5
MT2A
LIMK1
GGA1
PPP2CB
IL4R
RALA
PLCL2
UBB
ATP8A1
RGS12
RRAS
AGRN
PHLDA3
TMEM205
VAMP2
ALPK1
AKAP9
GSTM3
ATN1
MTCH1
POU2F2
ITPR3
2024-03-03
GNAQ
TCOF1
PTPN4
IMMP2L
DANT2
AHDC1
PARP12
CDC14A
TPM2
BLOC1S6
COL4A2
UVRAG
EPAS1
CCDC85B
LUCAT1
EIF3J-DT
COL6A2
ETV6
EPSTI1
PPDPF
LINC00472
HIST1H2AC
FAM107B
MIB1
CD40
PLAAT3
CERS4
GNG11
PABPC4
RPL7A
DNAJC1
YWHAQ
NME7
C11orf49
JPT1
RBKS
ELL2
CYTH2
FXYD5
MGST3
MZT2B
CKB
PNKD
CFAP20
LDHB
IP6K2
RB1
ZMYND11
COMMD9
RNF135
SLC27A4
RAP2A
CNTLN
RAB34
FAM184A
ZNF827
ECI1
GPX3
FOSL2
KLHL5
STX6
NIPAL3
KAT6B
ROGDI
ARL4D
ANK3
C12orf65
FBXO21
SHKBP1
POLR2I
NUDT4
BORCS7
MIOS
ACSL5
ATG4C
EFNB2
CD9
SASH1
ODC1
RSF1
ATP1A1
NKTR
TCEA2
FTX
LYSMD2
SWI5
UBAC2
CNTRL
MAP1LC3A
SCAMP2
EPB41L2
PGM2L1
UBE2D1
NUP214
RSBN1
HMGA1
MPZL3
LRRC8D
TLE5
CEMIP2
IFIH1
PLPP1
GPHN
DENND1A
CTNNBL1
HPS3
DNAJA4
TNRC6B
ZFAS1
NDFIP1
MIR99AHG
MEF2A
C11orf96
WWC2
ANTXR2
LINC00847
CARD8
RHOH
MINK1
LAMTOR2
COL1A1
APLP2
FAM214A
PLEKHB2
NDFIP2
PSIP1
CPLANE1
JAZF1
ARL13B
ATP5IF1
BMPR1A
HYAL2
STK40
SOCS6
DOT1L
MNAT1
MLF1
ARHGAP9
PLA2G4C
UNC119
FAM117A
CCDC186
IL21R
MRTFB
MACC1
ARL1
PTMS
GCC2
TMEM43
PARM1
VSIR
RAPGEF5
ZFYVE21
MEAF6
FNIP1
SLC9A7
CSTB
SLC25A5
CPVL
ATRAID
ZEB1
TNS3
INSR
TBC1D9
MIF
ADAM17
DUSP3
RTL8A
WARS
RPL35A
LEPROT
FOXN2
TECR
MESD
ATP2B4
CFAP97
SQOR
MYO1D
SLC44A2
IFT43
AK3
PPIB
NR6A1
MAN1A2
AC016831.1
BRD2
LAPTM4A
SLC49A4
GLG1
CFAP298
TBC1D14
DDX21
ENDOD1
PGK1
RAC1
GIT2
RPS27A
MOB1B
TUT7
MITF
PLEKHA3
GNA12
LYPLA1
MILR1
LRMDA
TPRA1
NDUFS5
SEC63
DNM2
FKBP9
BNIP2
IDH2
CYSTM1
RHOC
ARHGAP5
TGFBR1
UBXN4
WASHC4
NDUFA13
MAP3K2
KIF22
SGMS2
TTC39B
CSGALNACT2
TCF7
ITM2C
NPHP3
SLC43A3
LPAR6
SNHG5
SNX9
GRINA
ELF1
IGLC2
CHMP4B
TANK
CTDSPL
MORN2
RAB8B
ADCY9
BRI3BP
NAPA
RRAS2
UGDH
LLGL2
POLR2L
PPP2R3A
ASAP1
JOSD1
CCDC18
PDE4C
TMEM141
MBTPS1
AKAP13
MORC4
CASC4
NFIL3
STUB1
SRGAP2B
PINK1
PTPRA
SPAG9
SLC39A11
CYB561A3
CSRP1
POLD4
MORF4L1
ERLEC1
RPL13
DPM3
RTF1
CAPN2
DNAJB4
STARD10
SUMO2
BLVRA
VDR
ITPR1
C5orf24
ARL4A
IL32
ATP6V0C
SPCS1
PEMT
PSMB10
CDKN1B
RBPJ
UCP2
TCAF1
CRYBG1
DUSP6
ANAPC16
NDUFB9
LZTS2
NOD1
APMAP
HNRNPH3
NT5C3B
MIS18BP1
NECAP2
DEXI
MAGED1
KIF3A
ADCK2
SERF2
NUDT1
CBLB
MRPS26
BAD
MBOAT2
MYLIP
MTMR10
CLCN6
N4BP2L2
DUSP4
BOD1
LGMN
DMD
ATL2
CBX5
GADD45GIP1
SRSF10
FMNL3
LHFPL6
MINDY2
CDS1
KRTCAP2
MZT2A
ATF6
HP1BP3
HIST1H1C
BMERB1
SYTL1
CTSF
TRMT112
C1orf21
BACE2
RSRC2
TXLNG
NLRP1
SP110
C11orf58
CKAP4
MCUB
LUZP1
KANSL1
ARF4
EAPP
MAN1A1
SCML1
NIBAN1
PFKFB3
YIPF2
MORF4L2
PCBP1-AS1
ERN1
IGHG1
AAMDC
DLG1
ZBTB38
TBC1D12
SF3B6
HLA-B
GFPT1
BIRC3
TMEM70
THAP2
CYBRD1
HHEX
ABCD3
PRKCD
GTF2I
ATRX
CARD11
RPS6
TNFRSF14
TMED1
PRKCA
DOCK1
SYNE1
RABGEF1
LPCAT2
PMEPA1
HDDC2
RABAC1
WDR60
AC022217.3
RAB8A
RAB11B
MAP3K20
SPNS1
JPX
ERG28
ABI2
HYI
AKAP1
SRSF11
DYNLL1
FN1
PRXL2A
SPCS2
GABARAP
CYFIP1
TMEM106C
RPL37A
ARNTL
HDAC1
ST5
ACVR1
CCPG1
NSD3
TCIRG1
MYO1C
CCSER2
TRAF3IP3
ZNF428
TIMP2
FMC1
SKIL
MPG
ZNF124
USPL1
CFL2
SRA1
CGAS
CETN2
PHLDA1
LINC00278
RARA
SNHG29
RBM39
OSBPL8
SETBP1
RAB1A
FAM135A
RGS16
HIGD2A
PRR13
HBP1
KDELR1
AMDHD2
POR
FAM114A1
PCM1
WBP1
DDX60L
UBE2D3
TPR
APAF1
SPG21
TBL1XR1
MANBAL
RNPEPL1
COQ2
ARPC1A
EPHX1
HSPA5
CXXC5
CCDC138
KHDRBS3
RHOA
RILPL2
GLT8D1
SP140L
FAM102A
CHD6
KIAA1191
SELENOF
TSPYL1
UBE2R2
SLC20A2
CALU
JDP2
ALDH3A2
BHLHE40
ZNF626
MMP14
B4GALT1
CHD4
SLC38A6
HCFC1R1
PPIL4
GTF2H1
NAE1
REV3L
TXNL1
BAZ1A
C19orf53
SNHG19
PELI1
GPAT3
RANBP2
RSBN1L
DNAJC5
GIPC1
CNDP2
VAC14
DYNLRB1
TCEAL4
NUBP1
STAT3
SCMH1
HIBCH
VMA21
ST8SIA4
AC006001.2
UPF3A
UBE2H
TYK2
PTPRJ
DLEU2
ATP13A3
ZDHHC7
NCK2
RBMX
UPK3BL1
GKAP1
LMBRD1
[truncated: 2,790 more rows]

## Sheet: Table S6
lncRNA
SPART-AS1
FAM87B
ACTA2-AS1
AC138028.1
AC131971.1
AC091057.1
C9orf163
PDXDC2P-NPIPB14P
SNHG17
MIR29B2CHG
ADAMTSL4-AS1
AL121827.1
ARRDC1-AS1
AC115618.1
FAM83A-AS1
AC108134.1
THUMPD3-AS1
ALOX12-AS1
GAS8-AS1
AC106786.1
AC016738.1
AC002456.1
AL049795.1
AC025165.1
AC063965.2
AL390066.1
AL162586.1
LRRK2-DT
SNED1-AS1
RUSC1-AS1
LINC00115
DHDDS-AS1
AL050320.1
AL135960.1
ST7-AS2
AC016831.1
ENTPD1-AS1
FAM66C
AL136988.2
AL162584.1
AC016994.1
HPN-AS1
AL355581.1
LINC02803
AL121987.2
AC008781.1
BACH1-IT2
AC008269.1
LYST-AS1
ITGB1-DT
AL118508.1
ECE1-AS1
AC112484.1
LINC01160
DLEU2
LINC01704
LINC-PINT
HS1BP3-IT1
RPS6KA2-IT1
FAM215B
AC009495.2
ST3GAL5-AS1
AC107214.1
AC135050.1
ITGA6-AS1
COL4A2-AS1
AL157823.2
RGS5
AC008105.1
SPIN4-AS1
AL359715.1
AC074117.1
ETV5-AS1
AL121957.1
LINC01937
LINC01878
MAGI2-AS3
KAZN-AS1
SLIT1-AS1
Z82214.1
DAAM2-AS1
ZRANB2-AS1
DANT2
SMIM2-IT1
AC093083.1
UBE2R2-AS1
RBMS3-AS3
COX10-AS1
AL138921.2
AC026355.3
AC073257.2
AC002368.1
AL357079.1
LINC01410
ST6GAL2-IT1
AL023653.1
SOCAR
ADAMTS9-AS1
WWTR1-IT1
PDE6B-AS1
GK-AS1
MCCC1-AS1
AC010973.1
AC082651.3
ATP1B3-AS1
FOXP1-AS1
AC004918.1
AC123768.1
CXXC4-AS1
NEAT1
DDX11-AS1
EXTL3-AS1
SOCS2-AS1
AP000873.2
AC092343.1
AC079061.1
LINC02062
AC008443.3
LINC02102
HAS2-AS1
AC037441.1
HHIP-AS1
CLMAT3
AC079193.2
AC034231.1
AC079942.1
CACNA1G-AS1
AC008443.4
AC021491.2
AC112722.1
AC109361.2
AC138956.1
SNHG21
MIR3945HG
MALAT1
AC132219.1
AC040934.1
AC090739.1
AP001107.5
AC027031.2
OPCML-IT1
AP002807.1
LINC02704
AC084125.2
LINC02697
AP000857.2
AC073651.1
AC131009.1
AP001453.1
AP003170.3
AC018653.3
PSMA3-AS1
PRANCR
AC073896.4
AC025034.1
LINC02461
LINC02303
AL135999.1
AL133370.1
AL135818.1
AL157871.5
AL136295.2
LINC02883
AC087286.4
SH3RF3-AS1
AC022819.1
AC027601.1
AL031600.1
AL162741.1
AC132872.1
AC138305.1
AC026471.3
AC009107.2
LINC02555
AC022167.3
AC036103.1
AC109460.3
AC103706.1
TBILA
Z92544.1
AL138690.1
AC244090.2
AC084782.2
AC027601.2
AL079343.1
AC087392.3
AC129507.2
AC024361.1
MIR193BHG
AC116914.2
AC123768.2
AC040162.3
AC007216.4
AC006435.2
AC006441.1
AC012588.1
AC025682.1
AP005899.1
AC009716.1
AC010761.1
L3MBTL4-AS1
AP001033.1
AC005332.1
AC127024.3
MAFG-DT
LINC01970
AP001793.1
AC127540.1
AP001269.1
AC005625.1
AC023421.1
AP002449.1
AC011472.1
AC011481.1
AC022148.2
AC008105.3
AC092068.1
AC090409.2
AC020931.1
AC005180.1
AC015802.4
AC002546.1
AC016590.2
AC006305.3
RUNDC3A-AS1
AL592211.1
ZNF460-AS1
AC005253.1
AC005785.1
AC020915.1
AC012313.3
AC010271.1
A1BG-AS1
AC005387.1
AC010618.2
PTOV1-AS2
AC010618.3
AC008760.1
AL049840.3
AC068620.1
AC135178.6
AL117336.1
AC022239.1
AL049840.5
AL020997.2
AC232271.1
AL049840.6
AC016773.1
POC1B-AS1
AC010680.2
AL158163.1
AC007938.3
AC020907.4
AC010201.2
AL445228.2
LINC02772
AC104118.1
AC024060.2
AC005740.4
AL109811.2
AC103724.4
AC017076.1
AC021321.1
AC023302.1
AC013472.2
AL589739.1
AP003392.5
AL645940.1
Z97832.2
LINC02637
AL031432.3
AL139246.5
AC104964.3
AC093635.1
AL021707.6
AC009336.1
AC253536.6
AC010976.2
AC007038.1
AC004908.2
AL159169.2
AC004982.2
AC093388.1
AL117339.3
AC007349.4
AL355987.4
AP001269.4
LINC00653
AC131235.3
AC093726.2
AC062037.2
AC002059.1
AP001033.2
LINC02019
AC083880.1
AL732292.2
AC093788.1
AL162274.1
SUGT1-DT
AC024337.2
AC012313.9
AC068722.2
AL512506.1
AL136038.4
SYNGAP1-AS1
AC005899.6
AC092119.2
AC106782.5
AC090517.2
AL136964.1
AC120498.9
AC090241.3
ZKSCAN2-DT
AL031670.1
AC145285.6
AC132872.3
AL442125.1
AC130650.2
AC022306.3
AC074050.4
AL590096.1
AC093462.1
AC010331.1
AC107308.1
TSC22D1-AS1
AC005329.3
CTBP1-AS
LINC00921
SLFNL1-AS1
LINC01012
AC010642.2
AP000356.2
AC092902.4
AL031432.5
AC079781.5
AL034417.4
AC016831.6
TFAP2A-AS2
AC242988.2
AC006238.2
AL160396.2
AL158212.5
AL133444.1
AL442003.1
AC025774.1
NIPBL-DT
AF129075.3
AC017099.2
AC025449.2
AL162586.2
AL390066.2
AC004828.2
AC004863.1
AC000050.2
AC023483.1
AC098595.1
AC010201.3
AL021918.5
AC002331.1
AL589863.2
AC015871.6
U82671.1
AC108066.2
Z83745.1
AL691432.4
AL590101.1
AL499604.1
AL157893.2
AC106845.1
AC106865.2
AL137140.1
AC090948.4
AC037459.4
AC006059.5
AC093599.2
AC000082.1
AC053545.1
AL023806.4
AL132709.8
C3orf36
C8orf44

## Sheet: Table S7
Activated.B.cell	ADAM28	CD180	CD79B	BLK	CD19	MS4A1	TNFRSF17	IGHM	GNG7	MICAL3	SPIB	HLA-DOB	IGKC	PNOC	FCRL2	BACH2	CR2	TCL1A	AKNA	ARHGAP25	CCL21	CD27	CD38	CLEC17A	CLEC9A	CLECL1
Activated.CD4.T.cell	AIM2	BIRC3	BRIP1	CCL20	CCL4	CCL5	CCNB1	CCR7	DUSP2	ESCO2	ETS1	EXO1	EXOC6	IARS	ITK	KIF11	KNTC1	NUF2	PRC1	PSAT1	RGS1	RTKN2	SAMSN1	SELL	TRAT1
Activated.CD8.T.cell	ADRM1	AHSA1	C1GALT1C1	CCT6B	CD37	CD3D	CD3E	CD3G	CD69	CD8A	CETN3	CSE1L	GEMIN6	GNLY	GPT2	GZMA	GZMH	GZMK	IL2RB	LCK	MPZL1	NKG7	PIK3IP1	PTRH2	TIMM13	ZAP70
Activated.dendritic.cell	ABCD1	C1QC	CAPG	CCL3L3	CD207	CD302	ATP5B	ATP5L	ATP6V1A	BCL2L1	C1QB	SNURF	SPCS3	CCNA1	CEACAM8	NOS2	SRA1	TNFRSF6B	TREM1	TREML1	RHOA	SLC25A37	TNFSF14	TREML4	VNN2	XPO6	CLEC4C	TNFAIP2	UBD	ACTR3	RAB1A	SLA	HLA-DQA2	SIGLEC5	SLAMF9
CD56bright.natural.killer.cell	ABAT	C11orf75	C5orf15	CDHR1	DCAF12	DYNLL1	GPR137B	HCP5	HDGFRP2	KRT86	MLST8	ELMOD3	ENTPD5	FAM119A	FAM179A	CLIC2	COX7A2L	CREB3L4	CSF1	CSNK2A2	CSTA	CSTB	CTPS	CTSD	FST	GATA2	GMPR	HDC	HEY1	HOXA1	HS2ST1	HS3ST1	BCL11B	CDH3	MYL6B	NAA16	ClQA	ClQB	CYP27B1	EIF3M
CD56dim.natural.killer.cell	CYP27A1	DDX55	DYRK2	RPL37A	NOTCH3	AKR7A3	GPRC5C	GRIN1	HLA-E	PORCN	PSMC4	UPP1	IL21R	KIR2DS1	KIR2DS2	KIR2DS5
Eosinophil	GIPR	KRT18P50	LRMP	FOSB	RRP12	GPR183	NR4A3	ST3GAL6	DEPDC5	PDE6C	PKD2L2	GPR65	IL5RA	P2RY14	DACH1	DAPK2	EMR3
Gamma.delta.T.cell	ACP5	AQP9	BTN3A2	C1orf54	CARD8	CCL18	CD209	CD33	CD36	CDK5	IL10RB	KLRF1	LGALS1	MAPK7	KLHL7	KRT80	LAMC1	LCORL	LMNB1	MEIS3P1	MPL	FABP1	FABP5	FADD	MFAP3L	MINPP1	RPS24	RPS7	RPS9	DBNL	CCL13
Immature..B.cell	CD22	CYBB	FAM129C	FCRL1	FCRL3	FCRL5	FCRLA	HDAC9	HLA-DQA1	HVCN1	KIAA0226	NCF1	NCF1B	P2RY10	SP100	TXNIP	STAP1	TAGAP	ZCCHC2
Immature.dendritic.cell	ACADM	AHCYL1	ALDH1A2	ALDH3A2	ALDH9A1	ALOX15	AMT	ARL1	ATIC	ATP5A1	CAPZA1	LILRA5	RDX	RRAGD	TACSTD2	INPP5F	RAB38	PLAU	CSF3R	SLC18A2	AMPD2	CLTB	C1orf162
MDSC	CCR2	CD14	CD2	CD86	CXCR4	FCGR2A	FCGR2B	FCGR3A	FERMT3	GPSM3	IL18BP	IL4R	ITGAL	ITGAM	PARVG	PSAP	PTGER2	PTGES2	S100A8	S100A9
Macrophage	AIF1	CCL1	CCL14	CCL23	CCL26	CD300LB	CNR1	CNR2	EIF1	EIF4A1	FPR1	FPR2	FRAT2	GPR27	GPR77	RNASE2	MS4A2	BASP1	IGSF6	HK3	VNN1	FES	NPL	FZD2	FAM198B	HNMT	SLC15A3	CD4	TXNDC3	FRMD4A	CRYBB1	HRH1	WNT5B
Mast.cell	ADAMTS3	CPA3	CMA1	CTSG	ARHGAP15	CPM	FCN1	FTL	HSPA6	ITGA9	RNASE3	S100A4	SIGLEC8	SLC6A4	PTGS2	EGR3	PILRA
Monocyte	ASGR2	CFP	ASGR1	CD1D	UPK3A	ACTG1	ANXA5	ATP6V1B2	CFL1	DAZAP2	CTBS	EMR4P	HIVEP2	MARCKSL1	MBP	MMP15	PNPLA6	TMBIM6	PQBP1	TEX264	IKZF1
Natural.killer.T.cell	BTN2A2	CD101	CD109	CNPY3	CNPY4	CREB1	CRTC2	CRTC3	CSF2	KLRC1	FUT4	ICAM2	IL32	LAMP2	LILRB5	KLRG1	HSPA4	HSPB6	ISM2	ITIH2	KDM4C	KIR2DS4	KIRREL3	SDCBP	NFATC2IP	MICB	KIR2DL1	KIR2DL3	KIR3DL1	KIR3DL2	NCR1	FOSL1	TSLP	SLC7A7	SPP1	TREM2	UBASH3A	YBX2	CCDC88A	CLEC1A	THBD	PDPN	VCAM1	EMR1
Natural.killer.cell	AKT3	AXL	BST2	CDH2	CRTAM	CSF2RA	CTSZ	CXCL1	CYTH1	DAXX	DGKH	DLL4	DPYD	ERBB3	F11R	FAM27A	FAM49A	FASLG	FCGR1A	FN1	FSTL1	FUCA1	GBP3	GLS2	GRB2	LST1	BCL2	CDC5L	FGF18	FUT5	FZR1	GAGE2	IGFBP5	KANK2	LDB3
Neutrophil	CREB5	CDA	CHST15	S100A12	APOBEC3A	CASP5	MMP25	HAL	C1orf183	FFAR2	MAK	CXCR1	STEAP4	MGAM	BTNL8	CXCR2	TNFRSF10C	VNN3
Plasmacytoid.dendritic.cell	CBX6	DAB2	DDX17	HIGD1A	IDH3A	IL3RA	MAGED1	NUCB2	OFD1	OGT	PDIA4	SERTAD2	SIRPA	TMED2	ENG	FCAR	IGF1	ITGA2B	GABARAP	GPX1	KRT23	PROK2	RALB	RETNLB	RNF141	SEC14L1	SEPX1	EMP3	CD300LF	ABTB1	KLHL21	PHRF1
Regulatory.T.cell	CCL3L1	CD72	CLEC5A	FOXP3	ITGA4	L1CAM	LIPA	LRP1	LRRC42	MARCO	MMP12	MNDA	MRC1	MS4A6A	PELO	PLEK	PRSS23	PTGIR	ST8SIA4	STAB1
T.follicular.helper.cell	B3GAT1	CDK5R1	PDCD1	BCL6	CD200	CD83	CD84	FGF2	GPR18	CEBPA	CECR1	CLEC10A	CLEC4A	CSF1R	CTSS	DMN	DPP4	LRRC32	MC5R	MICA	NCAM1	NCR2	NRP1	PDCD1LG2	PDCD6	PRDX1	RAE1	RAET1E	SIGLEC7	SIGLEC9	TYRO3	CHST12	CLIC3	IVNS1ABP	KIR2DL2	LGMN
Type.1.T.helper.cell	CD70	TBX21	ADAM8	AHCYL2	ALCAM	B3GALNT1	BBS12	BST1	CD151	CD47	CD48	CD52	CD53	CD59	CD6	CD68	CD7	CD96	CFHR3	CHRM3	CLEC7A	COL23A1	COL4A4	COL5A3	DAB1	DLEU7	DOC2B	EMP1	F12	FURIN	GAB3	GATM	GFPT2	GPR25	GREM2	HAVCR1	HSD11B1	HUNK	IGF2	RCSD1	RYR1	SAV1	SELE	SELP	SH3KBP1	SIT1	SLC35B3	SIGLEC10	SKAP1
Type.17.T.helper.cell	IL17A	IL17RA	C2CD4A	C2CD4B	CA2	CCDC65	CEACAM3	IL17C	IL17F	IL17RC	IL17RE	IL23A	ILDR1	LONRF3	SH2D6	TNIP2	ABCA1	ABCB1	ADAMTS12	ANK1	ANKRD22	B3GALT2	CAMTA1	CCR9	CD40	GPR44	IFT80
Type.2.T.helper.cell	ASB2	CSRP2	DAPK1	DLC1	DNAJC12	DUSP6	GNAI1	LAMP3	NRP2	OSBPL1A	PDE4B	PHLDA1	PLA2G4A	RAB27B	RBMS3	RNF125	TMPRSS3	GATA3	BIRC5	CDC25C	CDC7	CENPF	CXCR6	DHFR	EVI5	GSTA4	HELLS	IL26	LAIR2
[truncated: 28 more columns]

## Sheet: Table S8
APC_co_inhibition	na	C10orf54	CD274	LGALS9	PDCD1LG2	PVRL3
APC_co_stimulation	na	CD40	CD58	CD70	ICOSLG	SLAMF1	TNFSF14	TNFSF15	TNFSF18	TNFSF4	TNFSF8	TNFSF9
CCR	na	CCL16	TPO	TGFBR2	CXCL2	CCL14	TGFBR3	IL11RA	CCL11	IL4I1	IL33	CXCL12	CXCL10	BMPER	BMP8A	CXCL11	IL21R	IL17B	TNFRSF9	ILF2	CX3CR1	CCR8	TNFSF12	CSF3	TNFSF4	BMP3	CX3CL1	BMP5	CXCR2	TNFRSF10D	BMP2	CXCL14	CCL28	CXCL3	BMP6	CCL21	CXCL9	CCL23	IL6	TNFRSF18	IL17RD	IL17D	IL27	CCL7	IL1R1	CXCR4	CXCR2P1	TGFB1I1	IFNGR1
Check-point	na	IDO1	LAG3	CTLA4	TNFRSF9	ICOS	CD80	PDCD1LG2	TIGIT	CD70	TNFSF9	ICOSLG	KIR3DL1	CD86	PDCD1	LAIR1	TNFRSF8	TNFSF15	TNFRSF14	IDO2	CD276	CD40	TNFRSF4	TNFSF14	HHLA2	CD244	CD274	HAVCR2	CD27	BTLA	LGALS9	TMIGD2	CD28	CD48	TNFRSF25	CD40LG	ADORA2A	VTCN1	CD160	CD44	TNFSF18	TNFRSF18	BTNL2	C10orf54	CD200R1	TNFSF4	CD200	NRP1
Cytolytic_activity	na	PRF1	GZMA
HLA	na	HLA-E	HLA-DPB2	HLA-C	HLA-J	HLA-DQB1	HLA-DQB2	HLA-DQA2	HLA-DQA1	HLA-A	HLA-DMA	HLA-DOB	HLA-DRB1	HLA-H	HLA-B	HLA-DRB5	HLA-DOA	HLA-DPB1	HLA-DRA	HLA-DRB6	HLA-L	HLA-F	HLA-G	HLA-DMB	HLA-DPA1
Inflammation-promoting	na	CCL5	CD19	CD8B	CXCL10	CXCL13	CXCL9	GNLY	GZMB	IFNG	IL12A	IL12B	IRF1	PRF1	STAT1	TBX21
MHC_class_I	na	B2M	HLA-A	TAP1
Parainflammation	na	CXCL10	PLAT	CCND1	LGMN	PLAUR	AIM2	MMP7	ICAM1	MX2	CXCL9	ANXA1	TLR2	PLA2G2D	ITGA2	MX1	HMOX1	CD276	TIRAP	IL33	PTGES	TNFRSF12A	SCARB1	CD14	BLNK	IFIT3	RETNLB	IFIT2	ISG15	OAS2	REL	OAS3	CD44	PPARG	BST2	OAS1	NOX1	PLA2G2A	IFIT1	IFITM3	IL1RN
T_cell_co-inhibition	na	BTLA	C10orf54	CD160	CD244	CD274	CTLA4	HAVCR2	LAG3	LAIR1	TIGIT
T_cell_co-stimulation	na	CD2	CD226	CD27	CD28	CD40LG	ICOS	SLAMF1	TNFRSF18	TNFRSF25	TNFRSF4	TNFRSF8	TNFRSF9	TNFSF14
Type_I_IFN_Reponse	na	DDX4	IFIT1	IFIT2	IFIT3	IRF7	ISG20	MX1	MX2	RSAD2	TNFSF10
Type_II_IFN_Reponse	na	GPR146	SELP	AHR
[truncated: 213 more columns]

## Sheet: Table S9
IDO1
LAG3
CTLA4
TNFRSF9
ICOS
CD80
PDCD1LG2
TIGIT
CD70
TNFSF9
ICOSLG
KIR3DL1
CD86
PDCD1
LAIR1
TNFRSF8
TNFSF15
TNFRSF14
IDO2
CD276
CD40
TNFRSF4
TNFSF14
HHLA2
CD244
CD274
HAVCR2
CD27
BTLA
LGALS9
TMIGD2
CD28
CD48
TNFRSF25
CD40LG
ADORA2A
VTCN1
CD160
CD44
TNFSF18
TNFRSF18
BTNL2
C10orf54
CD200R1
TNFSF4
CD200
NRP1
